1 **Microbial communities profiling in intensive care units expose**  
2 **limitations in current sanitary standards**

3

4 Lucas Ferreira Ribeiro<sup>1</sup>; Erica M. Lopes<sup>2</sup>; Luciano T. Kishi<sup>3</sup>; Liliane Fraga Costa  
5 Ribeiro<sup>4</sup>; Mayra Gonçalves Meneguetti<sup>5</sup>; Gilberto Gambero Gaspar<sup>5</sup>; Rafael Silva-  
6 Rocha<sup>2#</sup> and María Eugenia Guazzaroni<sup>1\*#</sup>

7

8

9 <sup>1</sup>Department of Biology, FFCLRP -University of São Paulo-USP, Ribeirão Preto, SP,  
10 Brazil. <sup>2</sup>Department of Cellular and Molecular Biology, FMRP -University of São Paulo-  
11 USP, Ribeirão Preto, SP, Brazil. <sup>3</sup>National Laboratory of Scientific Computing,  
12 Petrópolis, Rio de Janeiro, Brazil. <sup>4</sup>Department of Biochemistry and Immunology, FMRP  
13 -University of São Paulo-USP, Ribeirão Preto, SP, Brazil. <sup>5</sup>Infection Control Service, The  
14 Medical School Clinics Hospital -University of São Paulo-USP, Ribeirão Preto, SP,  
15 Brazil.

16

17 \*Correspondence to: María-Eugenia Guazzaroni, [mequazzaroni@ffclrp.usp.br](mailto:mequazzaroni@ffclrp.usp.br)  
18 Faculdade de Filosofia, Ciências e Letras de Ribeirão Preto, Universidade de São Paulo,  
19 Av. Bandeirantes, 3.900. CEP: 14049-901, Ribeirão Preto, São Paulo, Brazil.

20

21 # Both authors contributed equally for this work

22

23 **ABSTRACT**

24 Hospital-associated infections (HAIs) are the leading cause of morbidity and  
25 mortality in intensive care units (ICUs) and neonatal intensive care units (NICUs).  
26 Organisms causing these infections are often present on surfaces around the patient.  
27 Given that microbiotas may vary across different ICUs, the HAI-related microbial  
28 signatures within these units remain underexplored. In this study, we use deep-sequencing  
29 analyses to explore and compare the structure of bacterial communities at inanimate  
30 surfaces of the ICU and NICU wards of The Medical School Clinics Hospital (Brazil).  
31 The data revealed that NICU presents higher biodiversity than ICU and surfaces closest  
32 to the patient showed a peculiar microbiota, distinguishing one unit from the other.  
33 Several facultative anaerobes or obligate anaerobes HAI-related genera were classified as

34 biomarkers for the NICU, whereas *Pseudomonas* was the main biomarker for ICU.  
35 Correlation analyses revealed a distinct pattern of microbe-microbe interactions for each  
36 unit, including bacteria able to form multi-genera biofilms. Furthermore, we evaluated  
37 the effect of concurrent cleaning over the ICU bacterial community. The results showed  
38 that, although some bacterial populations decreased after cleaning, various HAI-related  
39 genera were quite stable to sanitization, suggesting being well-adapted to the ICU  
40 environment. Overall, these results enabled identification of discrete ICU and NICU  
41 reservoirs of potentially pathogenic bacteria and provided evidence for the presence of a  
42 set of biomarkers that distinguish these units. Moreover, the study exposed the  
43 inconsistencies of the routine cleaning to minimize HAI-related genera contamination.

44

#### 45 **IMPORTANCE**

46 Due to the high impact of HAIs, there is an urgent need for the development of robust  
47 policies on microbial surveillance to help guide procedures, improving infection control.  
48 To the best of our knowledge, this is the first comprehensive study, using a high-  
49 throughput approach, focused on comparing the microbiota peculiarities of the ICU and  
50 NICU in one of the largest public hospitals in Brazil. The work highlighted bacteria  
51 associated with nosocomial infections, identifying the most potent reservoirs of  
52 contamination, and evaluated the microbiota changes related to the cleaning procedure.  
53 Therefore, this study contributes to increase the knowledge about (N)ICUs microbiomes  
54 and may help to reduce health-care-associated infections, especially in developing  
55 countries.

56

57 **KEYWORDS:** ICU cleaning, Intensive care unit, Healthcare-associated infections,  
58 NICU biomarkers, Cross-contamination, Polyhexamethylene biguanide.

59

60

61

62

63

64

65

66

67

## 68 INTRODUCTION:

69 Microbiome refers to the microbial community, and their respective genomes,  
70 associated with a particular habitat, including natural or built environments [1]. Natural  
71 ecosystems have been well explored; however, not much is known about indoor  
72 microbiomes – offices, houses, buildings, hospitals, etc. – where the majority of our life  
73 is spent and can have a severe impact on human health. Unlike most indoor environments,  
74 intensive care units (ICUs) or neonatal intensive care unit (NICUs) in hospitals are  
75 routinely monitored by standard cultivation techniques [2,3]. Nonetheless, conventional  
76 cultivation techniques can identify only a tiny proportion of the total bacteria [2,4].  
77 Oberauner et al. [2] reported that only 2.5% of the overall bacterial diversity were  
78 identified in an ICU microbiome using culture-dependent methods. Culture-independent  
79 methods such as next-generation sequencing (NGS) technologies have a tremendous  
80 effect on profiling microbiomes. Phylogenetic analyses based on 16S gene diversity have  
81 been fundamental to uncover (N)ICU bacterial varieties in depth and at high resolution in  
82 space and time, and it can contribute to improving hospital safety.

83 In (N)ICUs, even adopting strict sanitation protocols, many patients are infected  
84 with healthcare-associated infections (HAIs), also known as nosocomial infections, a  
85 significant public health problem around the world [5–10]. HAIs include diseases that  
86 can be associated with surfaces and devices present in hospitals and can spread through  
87 health care staff, contaminated surfaces or air droplets. These infections are more frequent  
88 in UTIs where outbreaks often originate [11]. HAIs increase deaths (morbidity and  
89 mortality), antimicrobial resistance, prolong the duration of hospital stays, and  
90 consequentially healthcare costs [12]. The National Healthcare Safety Network of the  
91 Centers for Disease Control and Prevention (CDC) has estimated 687,000 HCAs in U.S.  
92 acute care hospitals causing 72,000 deaths, and costs estimated to \$97-147 billion  
93 annually [13,14]. The most common pathogen causing HAIs are *Clostridium difficile* and  
94 ‘ESKAPE’ bacteria (*Enterococcus spp.*, *Staphylococcus aureus*, *Klebsiella spp.*,  
95 *Acinetobacter spp.*, *Pseudomonas aeruginosa*, and Enterobacteriaceae) [14,15]. Many of  
96 these bacteria exhibit antimicrobial resistance and can cause infections of the  
97 bloodstream, urinary tract, severe pneumonia, and surgical site infection [11,16].

98 Hospital surfaces remain neglected reservoirs for HAI-related bacteria, and strict  
99 cleaning protocols have been used as the primary procedure to reduce the risks.  
100 Nonetheless, the efficiency of cleaning protocols, usually, has been investigated by

101 culture-dependent routine techniques. Here, using NGS methodology, we analyzed the  
102 differences and similarities between the structure of bacterial communities from the ICU  
103 and NICU surfaces of The Medical School Clinics Hospital (Ribeirão Preto, Brazil), one  
104 of the biggest hospitals in Latin America, and which has more than 35,000  
105 hospitalizations per year and supports a population of four million people. We  
106 hypothesized that the microbiota “signature” would vary significantly between ICU and  
107 NICU, offering opportunities for targeted spatial biomarkers to improve the combat  
108 against HAIs. Furthermore, we tested the impact of the standard cleaning procedure  
109 established on the hospital on ICU microbiota, focusing on bacteria associated with  
110 nosocomial infections.

111

## 112 **RESULTS AND DISCUSSION**

113

### 114 **Microbial profiling of ICU and NICU samples using V4-5 16 rRNA sequencing**

115 In order to compare the microbial community of the ICU and NICU from a clinical  
116 hospital in Brazil, we use NGS targeting V4 hypervariable regions within microbial 16S  
117 rRNA genes [17]. The intensive care units contained two wards with four beds each  
118 (**Fig.1**), where critically ill patients were present. Samples were collected from boxes  
119 areas (mattresses, bed rails, monitors, infusion pumps, ventilators, and cufflator), with  
120 patients lying down; and also, in common areas (computers-keyboard and mouse, doors  
121 handle, hospital cards, medical records, drug stations, and nurse’s mobiles). Furthermore,  
122 to address the question of how concurrent cleaning impacts the microbial ecosystem of  
123 an ICU, samples were sequenced either before or immediately after cleaning.

124 A total of ~1.7 million sequences corresponding to 4.94 Gbp of data from 44  
125 samples were generated. The average number of read counts per sample was 34.621,  
126 ranging from 33.708 to 34.739. Thus, the data counts were normalized to 33.708 reads.  
127 After trimming, the final number of operational taxonomic unit (OTU) consisted of 2054,  
128 1586, OTUs for NICU, and ICU, respectively. Rarefaction curves (**Fig. S1**) based on the  
129 number of OTUs observed were comparably close to asymptotic for all samples. The cut-  
130 off was set to 10,000 sequences per sample whereby the rarefaction curves of all samples  
131 reached saturation, indicating the availability of enough covering to represent and  
132 compare the microbiome community present within the samples. Chimera and singleton  
133 OTU removal was included in the data processing pipeline to prevent overestimated

134 richness. Bellow, we presented the analysis regarding the microbial composition for each  
135 sample and the comparison between the different areas analyzed.

136

### 137 **Comparative assessment between ICU and NICU microbiota**

138

139 Microbial profiling of the ICU and NICU allowed the identification of nine  
140 different bacterial phyla: *Firmicutes*, *Proteobacteria*, *Actinobacteria*, *Bacteroidetes*,  
141 *Fusobacteria*, *Cyanobacteria*, *Deinococcus*, *Gemmatimonadetes*, and *Euryarchaeota*,  
142 while this last was only found in NICU. *Firmicutes* and *Proteobacteria* were the most  
143 abundant phyla across all samples, composing 46% and 39% of these bacterial  
144 communities, respectively. The over-representation of these phyla agree with previous  
145 results obtained for microbial communities found in (N)ICUs inanimate surfaces [2,18–  
146 20]. The microbial communities at the genus level (**Fig. 2A**) included sequences of 138  
147 and 160 genera, for ICU and NICU respectively, among which a substantial number of  
148 organisms are not culturable. For all samples, the relative abundance of Not\_Assigned  
149 (NA) genera was notably moderated (up to 18%). Gram-positive bacteria were found in  
150 higher abundance in both units. Nonetheless, in terms of the number of genera, Gram-  
151 negative bacteria were more diverse. The number of strictly aerobic genera were highly  
152 represented (50%) followed by facultative anaerobe (36%) and obligatory anaerobic  
153 bacteria (14%) for both units (see details in supplemental material). *Bacillus*,  
154 *Staphylococcus*, and *Pseudomonas* were the most abundant genera (47% of the total  
155 reads) on ICU surfaces, and *Bacillus*, *Propionibacterium* and *Staphylococcus*  
156 predominated in NICU (40%). These genera contain many commensal species for  
157 humans, although it also includes members associated with nosocomial infections in  
158 (N)ICUs. Members from these genera are considered “survival specialists,” and can  
159 persist for months on dry surfaces [21] or associated with spore or biofilm formation  
160 [22,23]. A total of 110 OTUs were found only in ICU and 578 only in NICU, while 1476  
161 OTUs were shared between the units (**Fig. S2A**).

162 Analysis of all samples from the care units indicated that NICU samples showed  
163 a significantly higher Shannon index — a measure of diversity — as compared to samples  
164 belonging to ICU (Kruskal-Wallis test, p-value < 0.05) (**Fig. 2B**). However, noticeable  
165 variation was observed within the sample types (**Fig. S2B**), and computers and doors  
166 handle from both units showed the highest diversity among all samples. A higher Shannon  
167 index for NICU agrees with the differences in the number of OTUs found in the care

168 units. The greater diversity in NICU could be explained, in part, due to the higher transit  
169 of visitors (e.g., children's parents or relatives) compared with the more restrictive transit  
170 in ICU.

171 Beta diversity analysis (**Fig. 2C-D**) of the microbiota for each care unit revealed  
172 distinct, but overlapping, profile (ANOSIM,  $R= 0.3066$ ;  $p\text{-value} < 0.001$ ). A high level  
173 of variation among some samples was observed supplemented by less pronounced but  
174 distinct variation between ICU/NICU samples closer to the patient (boxes area)  
175 (ANOSIM,  $R= 0.50756$ ;  $p\text{-value} < 0.001$ ) (**Fig. S2C**). Samples from the common area  
176 did not show a significant difference (**Fig. S2D**). Boxes area samples from ward A and  
177 B, belonging to the same care unit, did not show a significant difference (**Fig. S2E-F**).  
178 This analysis suggests that ICU and NICU carry a distinct microbial diversity. Besides, it  
179 is also important to remark that more significant differences were observed in the  
180 confined area closer to the patients (boxes). These areas are selective environments,  
181 where antimicrobial therapies and stringent cleaning protocols are routinely applied.

182

### 183 **Identification of HAI-related genera in neglected (N)ICU surfaces**

184

185 Evidence suggests that hospital computers (keyboard and mouse) and staff's  
186 mobiles may serve as reservoirs for bacteria associated with HAI within the healthcare  
187 environment and facilitate the cross-contamination among hospital wards [24–26].  
188 Taxonomically, ICU mobiles revealed a far greater abundance of *Acinetobacter*,  
189 *Sphingomonas*, and *Brevundimonas* (**Fig. 3A**). These genera are usually found in moist  
190 environments and can show a high risk for HAI in immunocompromised patients.  
191 Besides, other genera associated with human microflora were also found in high  
192 abundances, such as *Lactobacillus* (mouth and vaginal flora) and *Anaerobiospirillum*  
193 (human, cat, and dog feces) [27]. NICU mobiles showed a greater abundance of  
194 *Fusobacterium*, *Neisseria*, *Rothia*, *Granulicatella*, and *Streptococcus* (**Fig. 3A**) that are  
195 part of the oronasopharynx or skin microflora. However, they can also be associated with  
196 severe infections in patients with a weakened immune system. Our data are consistent  
197 with previous studies that have reported that although mobiles can work as a repository  
198 to opportunistic pathogens, portions of their bacteria are also found on the human  
199 microbiome (owner's body) [28].

200 Computers are indispensable in contemporaneous hospitals, and consequently,  
201 keyboard and mouse may be contaminated with dangerous pathogenic bacteria [29,30].  
202 Here, we found potential opportunistic genera such as *Kocuria* (present at the skin and  
203 oral flora) and *Methylobacterium* in great abundance in ICU computers whereas NICU  
204 computers were enriched with *Rothia*, *Granulicatella*, *Streptococcus*, *Micrococcus*, and  
205 *Prevotella* (**Fig. 3A**). Another important, but generally neglected, potential vector of  
206 pathogens are the medical records (aka medical charts), especially those from (N)ICUs  
207 [31,32]. ICU medical records were enriched with *Dietzia* and *Flavobacterium*. NICU  
208 medical records were similar to NICU computers, except for being more abundant in  
209 *Bacteroides* (**Fig. 3A**). Moreover, fecal indicators were detected in a high proportion of  
210 NICU medical records (**Fig. S3A**). A hierarchical clustering analysis (**Fig. 3B**) based on  
211 the taxonomy of the ICU and NICU samples grouped them into two major clusters. Most  
212 of the samples from the same unit were clustered together indicating their similarity.  
213 Nonetheless, the microbiota community of ICU mobiles and handles were dispersed:  
214 mobiles-ICUab clustered closely with NICU ventilators (and mobiles), while ICU  
215 handles clustered with NICU handles group. These samples belonged to a cluster that  
216 revealed an almost absent *Bacillus* and higher frequency of *Streptococcus*, among other  
217 differences (**Fig. 3A-B**). Medical records were taxonomy similar to computers and also  
218 closer to monitors (**Fig. 3B**). Generally, for each unit, samples from surfaces frequently  
219 touched by HCW clustered together (**Fig. S4A-B**). These samples showed a higher  
220 abundance of skin-associated genera. The effects of these contamination sources for the  
221 patients were not part of this study. However, based on a vast literature, it is highly  
222 recommended to sensitize healthcare staff to sanitize mobiles, hands, computers and  
223 medical records (often neglected) to prevent cross-contamination within the hospital  
224 environment.

225

## 226 **Identification of ICU and NICU bacterial biomarkers**

227

228 Across the ICU and NICU samples, different biogeographical patterns were  
229 observed for the different microbiotas. LefSe analysis was performed to identify the  
230 distinguishing genera between ICU and NICU (**Fig. 4A**). LefSe is a method that allows  
231 biomarker discovery most likely to explain differences between groups based on  
232 statistical significance, biological consistency and effect relevance [33]. In total, 25  
233 genera were identified with LDA scores > 3.0. At the genus level, 11 specific biomarkers



234 were present in NICU and 6 in ICU. All of them were both highly discriminatory and  
235 significantly different (p-value and FDR < 0.05) in term of abundances (**Fig. 4B**). The  
236 HAI-related genera *Delftia*, *Streptococcus*, *Haemophilus*, *Gemella*, *Serratia*,  
237 *Elizabethkingia*, *Leptotrichia*, *Clostridium\_sensu\_stricto*, *Chryseobacterium*, and *Vibrio*  
238 were biomarkers for NICU. Although most of these genera can be found in the respiratory  
239 tract, mouth, vagina, and intestinal tract of healthy adults, they present a high potential  
240 for nosocomial infection in neonates. Among these genera, there is a predominance of  
241 organisms with low oxygen tolerance (facultative anaerobes or obligate anaerobes).  
242 *Pseudomonas* was identified as a biomarker for ICU. It is well known that nosocomial  
243 infections caused by *Pseudomonas* are more often in ICUs than in other wards in the  
244 hospital [34]. Except for *Streptococcus* and *Leptotrichia*, all these HAI-related genera  
245 were found mainly in surfaces closer to the patients (boxes areas). Biomarkers could be  
246 used as indicators for the contamination status in a specific area in the hospital. Genera  
247 detected as biomarkers suggest that some bacteria can adapt extraordinarily within a  
248 particular environment.

249

#### 250 **ICU and NICU microbiotas have well defined community-level structures**

251

252 Community-level relationships among the top 50 abundant bacterial genera were  
253 investigated through Pearson's r correlation analysis (**Fig. 5**). Microbial interaction has  
254 an essential influence on antibiotic resistance and pathogenicity. In the ICU microbiome  
255 (**Fig. 5A**), five distinct clusters (i-v) were detected with significant positive correlations  
256 (co-occurrence). These clusters include potentially pathogenic genera such as (i)  
257 *Enterobacter*, *Staphylococcus*, *Corynebacterium*, and *Escherichia\_Shigella*; (ii) Bacteria  
258 associated with outside environment (water, soil, and plants), among which  
259 *Pseudomonas*; (iii) *Stenotrophomonas*, *Acinetobacter*, *Sphingomonas*, and  
260 *Brevundimonas* (which can also cause co-infection with *Acinetobacter* spp.) [35]. (iv)  
261 *Enterococcus*, *Haemophilus*, *Kocuria*, *Dietzia*, *Gemella*, and *Neisseria*; (v) *Micrococcus*,  
262 *Fusobacterium*, *Prevotella*, *Delftia*, *Veillonella*, *Granulicatella*, *Rothia*, and  
263 *Streptococcus*. Except for *Pseudomonas*, the genera *Thermomonas*, *Bacillus*, and  
264 *Pseudoxanthomonas* showed negative correlations with all the five clusters cited above.  
265 In the NICU (**Fig. 5B**), we highlighted four (i-iv) clusters containing the following genera  
266 associated with nosocomial infections: (i) *Acinetobacter*, *Kocuria*, *Delftia*, and *Dietzia*;  
267 (ii) *Staphylococcus*, *Gemella*, and *Haemophilus*; (iii) *Fusobacterium*, *Neisseria*,



268 *Corynebacterium*, *Rothia*, *Granulicatella*, and *Streptococcus*; (iv) *Enterobacter*,  
269 *Enterococcus*, *Sphingomonas*, *Escherichia\_Shigella*, and *Serratia*. However, all these  
270 clusters revealed a strong negative correlation with *Bacillus*, *Sphingobium*,  
271 *Hydrogenophaga*, *Thauera*, *Thermomonas*, and *Gemmobacter*. It is important to note that  
272 most of these bacterial genera are known players in biofilms formation, including  
273 synergic multi-genera biofilms, on various hospital dry surfaces [36,37]. Biofilms matrix  
274 is a resistance mechanism that could stabilize a bacteria community in a selective  
275 environment such as (N)ICUs [38].

276 In order to verify whether the most prevalent potentially pathogenic genera  
277 identified in the ICU and NICU correlate with infected patients, 108 bacterial strains were  
278 isolated. Following standard cultivation, these strains were isolated from blood,  
279 bronchoalveolar lavage, peritoneal, cerebrospinal and ascitic fluids of hospitalized  
280 patients. All these isolates were identified, at the species level, by selective media,  
281 morphological features, and Vitek 2 rapid identification system and distributed among 12  
282 genera. These strains comprised the genera *Klebsiella*, *Acinetobacter*, *Stenotrophomonas*,  
283 *Staphylococcus*, *Streptococcus*, *Pseudomonas*, *Enterobacter*, *Escherichia*, *Burkholderia*,  
284 *Cupriavidus*, *Morganella*, and *Ralstonia*. The most common culture-dependent isolates  
285 matched with the most abundant HAI-related genera found in the sequencing data (**Fig.**  
286 **S5A-C**). This correlation shows that potentially pathogenic organisms, even when found  
287 in abundance <10% in sequencing, may be predominant in hospital infections. The  
288 majority of the isolates obtained belonged to *Staphylococcus*, which was the second more  
289 abundant Gram-positive genus found in the sequencing. *Staphylococcus* already is  
290 described as one of the most common genera found in hospitals [39].

291

## 292 **Investigation of ICU microbial community profiling reveals substantial variation on** 293 **the efficiency of the cleaning procedures**

294

295 Cleaning procedures at ICUs are an important practice to prevent HAI-related  
296 bacteria spreading [39]. Although the protocols may vary between hospitals, concurrent  
297 cleaning procedures involved strict disinfection and sterilization of patient supplies and  
298 equipment during hospitalization. Here, the antimicrobial solution used for daily ICU  
299 cleaning contained the cationic polymer polyhexamethylene biguanide (PHMB). A recent  
300 model suggests that PHMB enter bacterial cells and condenses chromosomes, inhibiting  
301 cell division [40]. Thus, in order to investigate how concurrent cleaning affects the ICU

302 microbiome, samples from surfaces near patients were sequencing and analyzed either  
303 before or immediately after cleaning. The microbial communities at genus level included  
304 sequences of 117 and 94 genera, for before and after cleaning respectively (**Fig. 6A**).  
305 Seven percent of the OTUs could not be classified to genera level (NA). These  
306 unclassified groups had higher relative abundance in cufflator-ICUab (35%). Samples  
307 after cleaning showed a slight but significant decrease in the diversity (Kruskal-Wallis  
308 test,  $p$ -value  $< 0.05$ ) (**Fig. 6B**). However, noticeable variation was observed within the  
309 sample types (**Fig. S6A**). Beta diversity analysis revealed distinct, but overlapping,  
310 profile ( $R = 0.091961$ ;  $p$ -value  $< 0.05$ ) (**Fig. 6C**). Most of the samples from ICU ward-A  
311 after cleaning clustered separately from the rest of the surfaces. Quite remarkably, these  
312 differences in diversity after cleaning reveal that the procedure did not have the same  
313 effect on all surfaces. Although it is known that different microbiomes may exert different  
314 effects on cleaning [37], this was not the case, since no significant difference between  
315 room A and B was observed prior to cleaning. Therefore, differences in the effect of  
316 cleanliness on diversity could be explained, in part, by a lack of standardization in the  
317 protocol.

318 The samples either before or after cleaning were inhabited by high relative  
319 abundances (~65%) of *Bacillus*, *Pseudoxanthomonas*, *Thermomonas*, *Staphylococcus*,  
320 *Castellaniella*, and *Acinetobacter*. Core microbiome analysis showed that 19 genera were  
321 shared in 80% of all samples (before and after) at the minimum detection threshold of  
322 0.001% relative abundance (**Fig. 6D**). Most notably, the most abundant genera were also  
323 clearly most prevalent in the core microbiome before and after cleaning. Gram-positive  
324 bacteria were found in higher abundance (before — 53%; after — 51%, respectively),  
325 showing 45 different genera before and 30 after cleaning (33% less). Furthermore, Gram-  
326 negative bacteria revealed higher diversity, with 72 genera before and 64 after cleaning  
327 (11% less). Most of the genera absent after cleaning showed very low abundance ( $<$   
328 0.05%) before cleaning. The HAI-related organism *Chryseobacterium*, and  
329 *Clostridium\_XI* are among the genera absent (or extremely low) after cleaning. Besides  
330 these absent genera, using the statistical parameters  $p$ -value and  $FDR < 0.05$ , no other  
331 analyzed genera showed a significant difference between the average abundance  
332 calculated for all samples before and after cleaning. However, the HAI-related genera  
333 *Comamonas*, *Pseudomonas*, *Enterobacter*, *Kocuria*, *Ralstonia*, and *Delftia* showed a  
334 decrease, while *Leptotrichia*, *Streptococcus*, and *Acinetobacter* presented an increase on  
335 average abundance  $\geq$ two-fold after cleaning (**Fig. S7A**). Curiously, cleaning efficiency

336 was notably variable among the samples (**Fig. S7B**). Previous studies have shown that  
337 even with strict cleaning procedures, HAI-related genera, such as *Staphylococcus*,  
338 *Klebsiella*, *Acinetobacter*, *Pseudomonas*, *Enterococcus*, *Escherichia*, and *Enterobacter*,  
339 are generally found on the surface of the ICU devices [41–45]. To examine more deeply  
340 the cleaning effect among the samples, a heatmap of the top 45 genera is illustrated in  
341 **Fig. 7A**. The cleaning efficiency was not the same through the samples and wards. Some  
342 genera showed a tendency to decrease after cleansing, such as *Enterococcus*,  
343 *Enterobacter*, *Staphylococcus*, *Burkholderia*, *Comamonas*, *Pseudomonas*, and *Delftia*.  
344 However, others increased in one ward and dropped in the other, such as  
345 *Corynebacterium* and *Acinetobacter* (increased for ward-A and decreased for ward-B) or  
346 *Prevotella* and *Novosphingobium* (decrease for ward-A and increase for ward-B).

347 Moreover, there were genera that revealed an tremendous increasing after  
348 cleaning in some specific surfaces, such as *Stenotrophomonas* (mattresses-ICUaA and  
349 rails-ICUbA), *Methylobacterium* (monitors-ICUbA), *Bacteroides*, *Neisseria*, and  
350 *Streptococcus* (rails-ICUaA), *Acinetobacter* and *Escherichia* (ventilators-ICUaA),  
351 *Dietzia* (monitors-ICUaA), *Delftia* (pumps-ICUbA), *Novosphingobium* and *Tepidimonas*  
352 (ventilators-ICUbA). Fecal indicators were detected in higher abundance after cleaning  
353 on bed rails (mainly on Rails-ICUaA) (**Fig. S3A**). These results reveal that cleaning was  
354 inconsistent and, in some cases, increased the load of specific genera. Previous studies  
355 have shown that hands are one of the primary vectors of HAI-related bacterial cross-  
356 contamination [46,47], mainly because of the variable compliance on hands hygiene and  
357 gloves changing after touching surfaces near to the patients [48]. Besides, disinfectant  
358 solutions and wipes used for hospital cleaning also can be a vital source of pathogen  
359 transfer and inconsistency in surfaces cleaning, even when standard protocols are  
360 followed [49]. Furthermore, other factors to be considered is the low efficiency of PHMB-  
361 based products in relation to contaminations by wound secretions or urine containing a  
362 massive load of bacteria [50], and a possible discrepancy in the cleaning procedure  
363 performed by different nurses. Based on hierarchical clustering analysis, before cleaning  
364 (**Fig. 7B**) most of the samples with the same functionality, but from different wards, were  
365 clustered together indicating their similarity. Nonetheless, the microbiota community  
366 after cleaning (**Fig. 7C**) revealed a higher dispersion among the samples. We speculate  
367 that cleaning could be a way of spreading colonizing genera from one surface to another,  
368 but that over time there may be a reestablishment of the microbial community related to  
369 a specific sample.

370

371 **Cleaning procedures generates substantial rearrangements in the community-level**  
372 **structures**

373 To investigate the changes in the microbial community structure before and after  
374 cleaning the correlation coefficients among the top 50 genera was analyzed (**Fig. 8A-B**).  
375 For the microbiome before cleaning, four distinct clusters (i-iv) were detected with  
376 significant positive co-occurrence (**Fig. 8A**). These clusters include potentially  
377 pathogenic genera such as (i) *Enterococcus*, *Escherichia\_Shigella*, *Stenotrophomonas*,  
378 *Enterobacter*, *Staphylococcus*, *Acinetobacter*, and *Corynebacterium*; (ii) *Dietzia*,  
379 *Streptococcus*, and *Veillonella*; (iii) *Sphingomonas*, *Neisseria*, and *Methylobacterium*;  
380 (iv) *Burkholderia*, *Pseudomonas*, *Ralstonia*, and *Comamonas*. The environmental genus  
381 *Belnapia* showed negative correlations with all the genera cited above.

382 After cleaning, six clusters (i-vi) are presented (**Fig. 8B**) containing highlighted  
383 genera associated with nosocomial infections: (i) *Stenotrophomonas* and other  
384 environmental genera; (ii) *Veillonella*, *Morganella*, *Streptococcus*, *Acinetobacter*,  
385 *Granulicatella*, *Comamonas*, *Corynebacterium*, *Staphylococcus*, *Haemophilus*, and  
386 *Neisseria*; (iii) *Methylobacterium*, *Escherichia*, and *Sphingomonas*. (iv) *Prevotella* and  
387 other genera related to low oxygen tolerance or vaginal microbiome [51]; (v)  
388 *Pseudomonas*, *Enterococcus*, *Pantoea*, and *Burkholderia*; (vi) *Enterobacter*, *Delftia*, and  
389 *Novosphingobium*. However, most of these HAI-related genera revealed a strong negative  
390 correlation with *Pseudoxanthomonas* (except *Delftia* and *Novosphingobium*). The  
391 correlation data showed a predominance of Proteobacteria among most of the clusters.  
392 Proteobacteria are predominant in the skin of the forearm [52] and are highly associated  
393 with biofilms formation on the surface of devices used on ICUs [36]. Several genera  
394 relationships were quite stable to disinfection stress because it was found clustered both  
395 before and after cleaning. In all the clusters were found genera associated with species  
396 able to form biofilms. Genera associated with xenobiotic metabolism were found among  
397 the clusters i-iv, and ii-v before and after cleaning, respectively [53,54]. After cleaning it  
398 was noticed a redistribution of some genera in new clusters. For example, a more  
399 extensive cluster involving ten HAI-related genera (ii) was formed after cleaning, this  
400 cluster included a mixture of several genera found in clusters i-iv before cleaning.  
401 Although this cluster analysis is useful to visualize the dynamics of microbiotas with the  
402 cleaning efficiency, further studies will be required to understand the exact changes in the  
403 microbe-microbe interactions underlying the differences observed across time.

404

## 405 **Conclusions**

406         The relevance of spatial composition of the microbial communities within a  
407 hospital is unclear. To our knowledge, this is the first study using deep sequencing of  
408 inanimate surfaces samples to develop a spatial assessment of the microbial community  
409 in ICU and NICU wards within the same hospital. In this comprehensive study, we  
410 observed a peculiar spatial structure between ICU and NICU microbiota in one of the  
411 largest hospitals in Brazil. The data revealed that among the samples analyzed, NICU  
412 presents higher biodiversity than in the ICU. Genera considered "survival specialists" are  
413 among the most persistent and abundant in both units. Areas closest to the patient hold  
414 more specific microbiota, distinguishing one unit from other. Most of the genera found  
415 in both units are present on the healthy human microbiome, suggesting that the most likely  
416 vectors of contamination are hospital staff and patients. Most of these genera can also be  
417 associated with nosocomial infection, especially for patients in (N)ICU. Devices  
418 commonly used, but generally neglected, such as mobile phones, computers, and medical  
419 charts are enriched with HAI-related genera (e.g., *Acinetobacter*, *Fusobacterium*,  
420 *Kocuria*, *Rothia*, and *Dietzia*). For the samples analyzed in the present study, some  
421 facultative anaerobes or obligate anaerobes genera were classified as biomarkers for the  
422 NICU (e.g., *Serratia* and *Clostridium*), whereas *Pseudomonas* as a biomarker for ICU.  
423 Correlation analyses revealed a distinct pattern of microbe-microbe interactions for each  
424 unit, including several bacteria able to form multi-genera biofilms. Cultivation-dependent  
425 results showed a positive correlation between the most abundant HAI-related genera  
426 identified by sequencing with infections found in the hospital. According, our data  
427 showed similarity with previous studies and can help to define soon what constitutes a  
428 "typical" microbiome in the ICU and NICU environments. The ability to identify HAI-  
429 related genera that are spatially concentrated in a hospital ward may influence the future  
430 use of improved tools and protocols for infection control.

431         Furthermore, we evaluated the effect of concurrent cleaning over the ICU bacterial  
432 community. Cleaning showed a slight decrease in diversity. Several genera were quite  
433 stable to disinfection, suggesting being well-adapted to the ICU environment. In general,  
434 the cleaning procedure was inconsistent. Potential influencing factors from the  
435 unsatisfactory cleaning include low efficiency of the biocide used, bacteria well-adapted  
436 to daily cleaning, disinfectant solutions and wipes contaminated, and variable compliance

437 on hands hygiene and cleaning procedure. Therefore, this type of analysis can be used for  
438 designing better strategies for cleaning procedures. In conclusion, we demonstrate here  
439 how NGS could be used for monitoring potential contamination sources in (N)ICU units  
440 and to evaluate existent decontamination protocols established in these unities. We  
441 highlight that similar approaches, while still very costly, could be implemented for  
442 periodic monitoring of microbial profiles in clinical hospitals to help reducing potential  
443 secondary infections.

444

## 445 **MATERIALS AND METHODS**

446

### 447 *Sample collection and DNA extraction*

448 A total of 158 samples were collected from the ICU and NICU at The Medical  
449 School Clinics Hospital (Ribeirão Preto, Brazil) by a single investigator from September  
450 to October 2018. The intensive care units contained two wards with four beds each, where  
451 critically ill patients from all medical specialties are treated. Samples from NICU were  
452 collected only before the concurrent cleaning, while from ICU samples were collected  
453 either before or immediately after cleaning. During sampling, all employees and devices  
454 of the ICU/NICU were in full operation. Boxes with patients lying down were swabbed  
455 on the surfaces of mattress, bed rail, monitors, infusion pumps, ventilator, and cufflator  
456 (when present). In common areas of the ICU/NICU, computer keyboard and mouse, doors  
457 handle, hospital cards, medical records, drug station, and nurse's mobiles were also  
458 swabbed. All sampling locations and their characteristics are given in Fig.1 and Table 1.  
459 The following code was used to name the samples: Samples-Unit (ICU or NICU) ward  
460 (a, b or ab) A (after cleaning), e.g., Monitors-ICUaA Samples were collected using sterile  
461 swabs (Absorve<sup>®</sup>, Jiangsu, China) premoistened with sterile Amies media [55]. The  
462 swabs were streaked across a 400-cm<sup>2</sup> area in four different directions with firm  
463 movements for 2 minutes; swabs were rotated to ensure full contact of all parts of the  
464 swab tip and the surface. After a surface was sampled, the swab was immediately placed  
465 into sterile 15-ml Falcon tubes containing 1 mL of sterile Amies media and stored in a  
466 4°C cooler until returning to the laboratory. In the laboratory, due to extremely low  
467 biomass, samples from a similar source and the same ward were pooled together –, e.g.,  
468 four monitors from NICU ward A is a pool, and four monitors from NICU ward B another  
469 pool– generating 43 pooled samples. Then, the samples were concentrated to 500 µL by



470 centrifugation (10000 g / 20min), and DNA was extracted using the MoBio Powersoil  
471 DNA isolation kit, then stored in a -80°C freezer until further processing.

472

473 *Concurrent cleaning procedures in the ICU*

474

475 At the beginning of each 24-h shift, a registered nurse washed his or her hands,  
476 put on nonsterile gloves, and wiped Boxes surfaces (mattress, bed rail, computer touch  
477 screens, monitors, infusion pumps, ventilator, and cufflator) with 1% polyhexamethylene  
478 biguanide (PHMB) solution on a soft wipe.

479

480 *Sequencing and diversity analysis*

481 The DNA concentrations were measured fluorometrically (Qubit® 3.0, kit Qubit®  
482 dsDNA Broad Range Assay Kit, Life Technologies, Carlsbad, CA, USA). DNA integrity  
483 was determined by agarose gel electrophoresis using a 0.8% (w/v) gel, and subsequent  
484 staining with SYBR Safe DNA Gel Stains (Invitrogen, Carlsbad, CA, USA). A PCR was  
485 employed to amplify the V4 regions of the 16S ribosomal RNA gene 16S rRNA for  
486 bacteria [17]. Each PCR reaction mixture contained 20 ng of metagenomic DNA, 10 µM  
487 of each forward and reverse primers, 1.25 mM of magnesium chloride, 200 µM of dNTP  
488 mix (Invitrogen, Carlsbad, CA, USA), 1.0 U Platinum Taq DNA polymerase high fidelity  
489 (Invitrogen, Carlsbad, CA, USA), high fidelity PCR buffer [1X], and milli-Q water.  
490 Reactions were held at 95 °C for 3 min, with amplification proceeding for 30 cycles at 95  
491 °C for 30 s, 53.8 °C for 30 s, and 72 °C for 45 s; a final extension of 10 min at 72 °C was  
492 added to ensure complete amplification. The expected fragment length of PCR products  
493 was verified by agarose gel (1%) electrophoresis, and the amplicon size was estimated by  
494 comparison with a 1 kb plus DNA ladder (1 kb plus DNA ladder, Invitrogen, Carlsbad,  
495 CA, USA). The PCR fragments were purified using the Zymoclean™ Gel DNA Recovery  
496 kit following the manufacturer's instructions. Sequencing was performed using the Miseq  
497 Reagent kit v3 2 x 300 bp.

498 All sequences data were processed, removing adapters using Scythe 0.991  
499 (<https://github.com/vsbuffalo/scythe>) and Cutadapt 1.7.1 [56]. Sequence trimming was  
500 carried out by selecting sequences over 200 bp in length with an average quality score  
501 higher than 20 based on Phred quality, and duplicate reads were removed using the  
502 Prinseq program [57]. The QIIME software package version 1.9.1 was used to filter reads  
503 and determine Operational Taxonomic Units (OTUs) as described in Caporaso et al.

504 (2010). The Usearch algorithm was used to cluster the reads OTUs with a 97% cutoff,  
505 and to assign taxonomy using the Ribosomal Database Project (RDPII) version 10 [58].  
506 Bacterial sequences were de-noised, and suspected chimeras were removed using the  
507 OTU pipe function within QIIME. Sequence data were summarized at the phylum, class,  
508 and family levels; Also, Alpha\_diversity.py in QIIME was used to calculate ACE, Chao1,  
509 Shannon, and Simpson indices. Principal coordinate analyses (PCoA) were conducted to  
510 evaluate differences in community structure among experimental groups ( $\beta$ -diversity).

511 For further statistical analysis and visualization, OTU table with taxa in plain  
512 format and metadata file were uploaded to the MicrobiomeAnalyst tool (available at  
513 <http://www.microbiomeanalyst.ca>) [59]. Shallow abundant features were filtered using  
514 options; minimum count 4, low-count filter based on 20% prevalence in samples. For  
515 comparative analyses, a low variance filter was applied based on Inter-quantile range and  
516 removing the 10% lowest features. Data were rarefied to the minimum library size and  
517 normalized using total sum scaling (TSS) before any statistical comparisons [60].

518

519

#### 520 **Availability of supporting data**

521 The nucleotide sequences obtained in the present study have been deposited in the  
522 GenBank database under the Accession number PRJNA541082.

523

#### 524 **Competing interests**

525 The authors declare that no non-financial conflicts of interest exist.

526

#### 527 **Ethics approval and consent to participate**

528 No specific permissions or ethics approval were required for this study with inanimate  
529 surfaces.

530

#### 531 **Funding**

532 This work was supported by the Young Research Awards by the Sao Paulo State  
533 Foundation (FAPESP, award numbers 2015/04309-1 and 2012/21922-8). Lucas F.  
534 Ribeiro and Liliane F. C. Ribeiro are beneficiaries of FAPESP fellowships (award  
535 numbers 2016/18827-7 and 2016/20358-5, respectively).

536

537

## 538 **Author Contributions**

539 LFR, RSR, and MEG conceived of the project. LFR, LFCR, MGM, and GGG organized  
540 the sample collections. LFR conducted the nucleic acid extractions. EML and LTK  
541 conducted the MiSeq library preparations and provided the bioinformatics support, and  
542 LFR contributed to the data analysis. LFR, RSR, and MEG wrote the final manuscript.  
543 All authors have read and approved the manuscript.

544

## 545 **References**

546

- 547 1. Marchesi JR, Ravel J. The vocabulary of microbiome research: a proposal.  
548 *Microbiome*. 2015; doi:10.1186/s40168-015-0094-5
- 549 2. Oberauer L, Zachow C, Lackner S, Högenauer C, Smolle KH, Berg G. The  
550 ignored diversity: Complex bacterial communities in intensive care units revealed  
551 by 16S pyrosequencing. *Sci Rep*. 2013; doi:10.1038/srep01413
- 552 3. Daneman N, Stukel TA, Ma X, Vermeulen M, Guttmann A. Reduction in  
553 *Clostridium difficile* infection rates after mandatory hospital public reporting:  
554 Findings from a longitudinal cohort study in Canada. *PLoS Med*. 2012;  
555 doi:10.1371/journal.pmed.1001268
- 556 4. Staley JT, Konopka A. Measurement of in Situ Activities of Nonphotosynthetic  
557 Microorganisms in Aquatic and Terrestrial Habitats. *Annu Rev Microbiol*. 2003;  
558 doi:10.1146/annurev.mi.39.100185.001541
- 559 5. Allegranzi B, Nejad SB, Combescure C, Graafmans W, Attar H, Donaldson L, et  
560 al. Burden of endemic health-care-associated infection in developing countries:  
561 Systematic review and meta-analysis. *Lancet*. 2011; doi:10.1016/S0140-  
562 6736(10)61458-4
- 563 6. Calfee DP. Crisis in Hospital-Acquired, Healthcare-Associated Infections. *Annu*  
564 *Rev Med*. 2011; doi:10.1146/annurev-med-081210-144458
- 565 7. WHO. Report on the Burden of Endemic Health Care-Associated Infection  
566 Worldwide. In: <http://whqlibdoc.who.int/publications>. 2011.  
567 doi:[http://whqlibdoc.who.int/publications/2011/9789241501507\\_eng.pdf](http://whqlibdoc.who.int/publications/2011/9789241501507_eng.pdf)
- 568 8. Teerawattanapong N, Panich P, Kulpokin D, Na Ranong S, Kongpakwattana K,  
569 Saksinanon A, et al. A systematic review of the burden of multidrug-resistant  
570 healthcare-associated infections among intensive care unit patients in southeast  
571 asia: The rise of multidrug-resistant *acinetobacter baumannii*. *Infection Control*  
572 *and Hospital Epidemiology*. 2018. doi:10.1017/ice.2018.58
- 573 9. Walter J, Haller S, Quinten C, Kärki T, Zacher B, Eckmanns T, et al. Healthcare-  
574 associated pneumonia in acute care hospitals in European union/European  
575 economic area countries: An analysis of data from a point prevalence survey, 2011  
576 to 2012. *Eurosurveillance*. 2018; doi:10.2807/1560-7917.ES.2018.23.32.1700843
- 577 10. Zimlichman E, Henderson D, Tamir O, Franz C, Song P, Yamin CK, et al. Health  
578 care-associated infections: A Meta-analysis of costs and financial impact on the US  
579 health care system. *JAMA Intern Med*. 2013;  
580 doi:10.1001/jamainternmed.2013.9763
- 581 11. Agaba P, Tumukunde J, Tindimwebwa JVB, Kwizera A. Nosocomial bacterial  
582 infections and their antimicrobial susceptibility patterns among patients in  
583 Ugandan intensive care units: A cross sectional study. *BMC Res Notes*. 2017;

- 584 doi:10.1186/s13104-017-2695-5
- 585 12. CDC. Healthcare-associated infections [Internet]. Available:  
586 <https://www.cdc.gov/hai/index.html>
- 587 13. CDC. HAI Hospital Prevalence Survey [Internet]. Available:  
588 <https://www.cdc.gov/hai/data/portal/index.html>
- 589 14. Magill SS, Edwards JR, Bamberg W, Beldavs ZG, Dumyati G, Kainer MA, et al.  
590 Multistate Point-Prevalence Survey of Health Care–Associated Infections. *N Engl*  
591 *J Med*. 2014; doi:10.1056/NEJMoa1306801
- 592 15. Magill SS, O’Leary E, Janelle SJ, Thompson DL, Dumyati G, Nadle J, et al.  
593 Changes in Prevalence of Health Care–Associated Infections in U.S. Hospitals. *N*  
594 *Engl J Med*. 2018; doi:10.1056/NEJMoa1801550
- 595 16. Lax S, Gilbert JA. Hospital-associated microbiota and implications for nosocomial  
596 infections. *Trends in Molecular Medicine*. 2015.  
597 doi:10.1016/j.molmed.2015.03.005
- 598 17. Caporaso JG, Lauber CL, Walters WA, Berg-Lyons D, Lozupone CA, Turnbaugh  
599 PJ, et al. Global patterns of 16S rRNA diversity at a depth of millions of sequences  
600 per sample. *Proc Natl Acad Sci*. 2011;108: 4516–4522.  
601 doi:10.1073/pnas.1000080107
- 602 18. Poza M, Gayoso C, Gómez MJ, Rumbo-Feal S, Tomás M, Aranda J, et al.  
603 Exploring Bacterial Diversity in Hospital Environments by GS-FLX Titanium  
604 Pyrosequencing. *PLoS One*. 2012; doi:10.1371/journal.pone.0044105
- 605 19. Bokulich NA, Mills DA, Underwood MA. Surface microbes in the neonatal  
606 intensive care unit: Changes with routine cleaning and over time. *J Clin Microbiol*.  
607 2013; doi:10.1128/JCM.00898-13
- 608 20. Brooks B, Firek BA, Miller CS, Sharon I, Thomas BC, Baker R, et al. Microbes in  
609 the neonatal intensive care unit resemble those found in the gut of premature  
610 infants. *Microbiome*. 2014; doi:10.1186/2049-2618-2-1
- 611 21. Kramer A, Schwebke I, Kampf G. How long do nosocomial pathogens persist on  
612 inanimate surfaces? A systematic review. *BMC Infectious Diseases*. 2006.  
613 doi:10.1186/1471-2334-6-130
- 614 22. Achermann Y, Goldstein EJC, Coenye T, Shirliff ME. *Propionibacterium acnes*:  
615 From Commensal to opportunistic biofilm-associated implant pathogen. *Clin*  
616 *Microbiol Rev*. 2014; doi:10.1128/CMR.00092-13
- 617 23. Majed R, Faille C, Kallassy M, Gohar M. *Bacillus cereus* Biofilms-same, only  
618 different. *Frontiers in Microbiology*. 2016. doi:10.3389/fmicb.2016.01054
- 619 24. Badr RI, Badr HI, Ali NM. Mobile phones and nosocomial infections. *Int J Infect*  
620 *Control*. 2012; doi:10.3396/ijic.v8i2.014.12
- 621 25. Brady RRW, Verran J, Damani NN, Gibb AP. Review of mobile communication  
622 devices as potential reservoirs of nosocomial pathogens. *Journal of Hospital*  
623 *Infection*. 2009. doi:10.1016/j.jhin.2008.12.009
- 624 26. Brady RR, Hunt AC, Visvanathan A, Rodrigues MA, Graham C, Rae C, et al.  
625 Mobile phone technology and hospitalized patients: A cross-sectional surveillance  
626 study of bacterial colonization, and patient opinions and behaviours. *Clin*  
627 *Microbiol Infect*. 2011; doi:10.1111/j.1469-0691.2011.03493.x
- 628 27. Malnick H, Williams K, Phil-Ebosie J, Levy AS. Description of a medium for  
629 isolating *Anaerobiospirillum* spp., a possible cause of zoonotic disease, from  
630 diarrheal feces and blood of humans and use of the medium in a survey of human,  
631 canine, and feline feces. *J Clin Microbiol*. 1990;
- 632 28. Meadow JF, Altrichter AE, Green JL. Mobile phones carry the personal  
633 microbiome of their owners. *PeerJ*. 2014; doi:10.7717/peerj.447

- 634 29. Jones HW. Bacterial contamination of keyboards: Efficacy and functional impact  
635 of disinfectants - Commentary. *Obstetrical and Gynecological Survey*. 2007.  
636 doi:10.1097/01.ogx.0000253752.51984.e7
- 637 30. Bures S, Fishbain JT, Uyehara CFT, Parker JM, Berg BW. Computer keyboards  
638 and faucet handles as reservoirs of nosocomial pathogens in the intensive care unit.  
639 *Am J Infect Control*. 2000; doi:10.1067/mic.2000.107267
- 640 31. Teng S-O, Lee W-S, Ou T-Y, Hsieh Y-C, Lee W-C, Lin Y-C. Bacterial  
641 contamination of patients' medical charts in a surgical ward and the intensive care  
642 unit: impact on nosocomial infections. *J Microbiol Immunol Infect*. 2009;
- 643 32. Chen KH, Chen LR, Wang YK. Contamination of medical charts: An important  
644 source of potential infection in hospitals. *PLoS One*. 2014;  
645 doi:10.1371/journal.pone.0078512
- 646 33. Segata N, Izard J, Waldron L, Gevers D, Miropolsky L, Garrett WS, et al.  
647 Metagenomic biomarker discovery and explanation. *Genome Biol*. 2011;  
648 doi:10.1186/gb-2011-12-6-r60
- 649 34. Donowitz LG, Wenzel RP, Hoyt JW. High risk of hospital-acquired infection in  
650 the ICU patient. *Crit Care Med*. 1982; doi:10.1097/00003246-198206000-00001
- 651 35. Ryan MP, Pembroke JT. *Brevundimonas* spp: Emerging global opportunistic  
652 pathogens. *Virulence*. 2018; doi:10.1080/21505594.2017.1419116
- 653 36. Perez E, Williams M, Jacob JT, Reyes MD, Tejedor SC, Steinberg JP, et al.  
654 Microbial biofilms on needleless connectors for central venous catheters:  
655 Comparison of standard and silver-coated devices collected from patients in an  
656 acute care hospital. *J Clin Microbiol*. 2014; doi:10.1128/JCM.02220-13
- 657 37. Hu H, Johani K, Gosbell IB, Jacombs ASW, Almatroudi A, Whiteley GS, et al.  
658 Intensive care unit environmental surfaces are contaminated by multidrug-resistant  
659 bacteria in biofilms: Combined results of conventional culture, pyrosequencing,  
660 scanning electron microscopy, and confocal laser microscopy. *J Hosp Infect*. 2015;  
661 doi:10.1016/j.jhin.2015.05.016
- 662 38. Fux CA, Costerton JW, Stewart PS, Stoodley P. Survival strategies of infectious  
663 biofilms. *Trends in Microbiology*. 2005. doi:10.1016/j.tim.2004.11.010
- 664 39. Mora M, Mahnert A, Koskinen K, Pausan MR, Oberauner-Wappis L, Krause R, et  
665 al. Microorganisms in confined habitats: Microbial monitoring and control of  
666 intensive care units, operating rooms, cleanrooms and the international space  
667 station. *Frontiers in Microbiology*. 2016. doi:10.3389/fmicb.2016.01573
- 668 40. Chindera K, Mahato M, Kumar Sharma A, Horsley H, Kloc-Muniak K,  
669 Kamaruzzaman NF, et al. The antimicrobial polymer PHMB enters cells and  
670 selectively condenses bacterial chromosomes. *Sci Rep*. 2016;  
671 doi:10.1038/srep23121
- 672 41. Myers MG. Longitudinal evaluation of neonatal nosocomial infections: association  
673 of infection with a blood pressure cuff. *Pediatrics*. 1978;
- 674 42. Livornese LL, Dias S, Samel C, Romanowski B, Taylor S, May P, et al. Hospital-  
675 acquired infection with vancomycin-resistant *Enterococcus faecium* transmitted by  
676 electronic thermometers. *Ann Intern Med*. 1992; doi:10.7326/0003-4819-117-2-  
677 112
- 678 43. Marinella MA. The stethoscope. A potential source of nosocomial infection? *Arch*  
679 *Intern Med*. 2003; doi:10.1001/archinte.157.7.786
- 680 44. Schabrun S, Chipchase L, Rickard H. Are therapeutic ultrasound units a potential  
681 vector for nosocomial infection? *Physiother Res Int*. 2006; doi:10.1002/pri.329
- 682 45. Safdar N, Drayton J, Dern J, Warrack S, Duster M, Schmitz M. Telemetry leads  
683 harbor nosocomial pathogens. *Int J Infect Control*. 2012;



- 684 doi:10.3396/ijic.v8i2.012.12
- 685 46. Agodi A, Barchitta M, Cipresso R, Giaquinta L, Romeo MA, Denaro C.  
686 *Pseudomonas aeruginosa* carriage, colonization, and infection in ICU patients.  
687 *Intensive Care Med.* 2007; doi:10.1007/s00134-007-0671-6
- 688 47. Weber DJ, Rutala WA, Miller MB, Huslage K, Sickbert-Bennett E. Role of  
689 hospital surfaces in the transmission of emerging health care-associated pathogens:  
690 *Norovirus, Clostridium difficile, and Acinetobacter* species. *Am J Infect Control.*  
691 2010; doi:10.1016/j.ajic.2010.04.196
- 692 48. Ali S, Wilson APR. Effect of poly-hexamethylene biguanide hydrochloride  
693 (PHMB) treated non-sterile medical gloves upon the transmission of *Streptococcus*  
694 *pyogenes*, carbapenem-resistant *E. coli*, MRSA and *Klebsiella pneumoniae* from  
695 contact surfaces. *BMC Infect Dis.* 2017; doi:10.1186/s12879-017-2661-9
- 696 49. Ramm L, Siani H, Wesgate R, Maillard JY. Pathogen transfer and high variability  
697 in pathogen removal by detergent wipes. *Am J Infect Control.* 2015;  
698 doi:10.1016/j.ajic.2015.03.024
- 699 50. Hedin G, Rynbäck J, Loré B. Reduction of bacterial surface contamination in the  
700 hospital environment by application of a new product with persistent effect. *J Hosp*  
701 *Infect.* 2010; doi:10.1016/j.jhin.2010.02.007
- 702 51. Younes JA, Lievens E, Hummelen R, van der Westen R, Reid G, Petrova MI.  
703 *Women and Their Microbes: The Unexpected Friendship.* *Trends in Microbiology.*  
704 2018. doi:10.1016/j.tim.2017.07.008
- 705 52. Grice EA, Segre JA. The skin microbiome. *Nature Reviews Microbiology.* 2011.  
706 doi:10.1038/nrmicro2537
- 707 53. Haiser HJ, Turnbaugh PJ. Developing a metagenomic view of xenobiotic  
708 metabolism. *Pharmacological Research.* 2013. doi:10.1016/j.phrs.2012.07.009
- 709 54. Das A, Srinivasan M, Ghosh TS, Mande SS. Xenobiotic metabolism and gut  
710 microbiomes. *PLoS One.* 2016; doi:10.1371/journal.pone.0163099
- 711 55. Amies CR. A modified formula for the preparation of Stuart's Transport Medium.  
712 *Can J Public Heal.* 1967;
- 713 56. Martin M. Cutadapt removes adapter sequences from high-throughput sequencing  
714 reads. *EMBnet.journal.* 2011;17: 10. doi:10.14806/ej.17.1.200
- 715 57. Schmieder R, Edwards R. Quality control and preprocessing of metagenomic  
716 datasets. *Bioinformatics.* 2011;27: 863–864. doi:10.1093/bioinformatics/btr026
- 717 58. Cole JR, Wang Q, Fish JA, Chai B, McGarrell DM, Sun Y, et al. Ribosomal  
718 Database Project: data and tools for high throughput rRNA analysis. *Nucleic Acids*  
719 *Res.* 2014;42: D633–D642. doi:10.1093/nar/gkt1244
- 720 59. Dhariwal A, Chong J, Habib S, King IL, Agellon LB, Xia J. MicrobiomeAnalyst:  
721 A web-based tool for comprehensive statistical, visual and meta-analysis of  
722 microbiome data. *Nucleic Acids Res.* 2017; doi:10.1093/nar/gkx295
- 723 60. Paulson JN, Colin Stine O, Bravo HC, Pop M. Differential abundance analysis for  
724 microbial marker-gene surveys. *Nat Methods.* 2013; doi:10.1038/nmeth.2658
- 725 61. I. B. Clinical review: Bacteremia caused by anaerobic bacteria in children. *Crit*  
726 *Care.* 2002;
- 727 62. Cosseau C, Romano-Bertrand S, Duplan H, Lucas O, Ingrassia I, Pigasse C, et al.  
728 Proteobacteria from the human skin microbiota: Species-level diversity and  
729 hypotheses. *One Heal.* 2016; doi:10.1016/j.onehlt.2016.02.002
- 730 63. Palmer RJ. Composition and development of oral bacterial communities.  
731 *Periodontol 2000.* 2014; doi:10.1111/j.1600-0757.2012.00453.x
- 732 64. Mo S, Wei L, Chen H, Li R, Li S, Luo G. A chinese case of *Prevotella intermedia*  
733 and *Streptococcus constellatus* intracranial mixed infection. *Metab Brain Dis.*



- 734 2018; doi:10.1007/s11011-017-0142-x
- 735 65. Rovey C, Etienne A, Foucault C, Berger P, Brouqui P. *Veillonella*  
736 *montpellierensis* endocarditis. *Emerg Infect Dis.* 2005;  
737 doi:10.3201/eid1107.041361
- 738 66. Zaninetti-Schaerer A, Van Delden C, Genevay S, Gabay C. Total hip prosthetic  
739 joint infection due to *Veillonella* species [2]. *Joint Bone Spine.* 2004.  
740 doi:10.1016/j.jbspin.2003.10.019
- 741 67. Liu JW, Wu JJ, Wang LR, Teng LJ, Huang TC. Two fatal cases of *Veillonella*  
742 bacteremia [2]. *European Journal of Clinical Microbiology and Infectious*  
743 *Diseases.* 1998. doi:10.1007/BF01584370
- 744 68. Rodríguez JM, Murphy K, Stanton C, Ross RP, Kober OI, Juge N, et al. The  
745 composition of the gut microbiota throughout life, with an emphasis on early life.  
746 *Microb Ecol Health Dis.* 2015; doi:10.3402/mehd.v26.26050
- 747 69. Layton A, McKay L, Williams D, Garrett V, Gentry R, Saylor G. Development of  
748 *Bacteroides* 16S rRNA gene taqman-based real-time PCR assays for estimation of  
749 total, human, and bovine fecal pollution in water. *Appl Environ Microbiol.* 2006;  
750 doi:10.1128/AEM.01036-05
- 751 70. Falagas ME, Siakavellas E. *Bacteroides*, *Prevotella*, and *Porphyromonas* species:  
752 A review of antibiotic resistance and therapeutic options. *International Journal of*  
753 *Antimicrobial Agents.* 2000. doi:10.1016/S0924-8579(99)00164-8
- 754 71. Woodford N, Livermore DM. Infections caused by Gram-positive bacteria: a  
755 review of the global challenge. *J Infect.* 2009; doi:10.1016/S0163-4453(09)60003-  
756 7
- 757 72. Prabaker K, Weinstein RA. Trends in antimicrobial resistance in intensive care  
758 units in the United States. *Current Opinion in Critical Care.* 2011.  
759 doi:10.1097/MCC.0b013e32834a4b03
- 760 73. de Kraker MEA, Davey PG, Grundmann H. Mortality and hospital stay associated  
761 with resistant *Staphylococcus aureus* and *Escherichia coli* bacteremia: Estimating  
762 the burden of antibiotic resistance in Europe. *PLoS Med.* 2011;  
763 doi:10.1371/journal.pmed.1001104
- 764 74. Macvane SH. Antimicrobial Resistance in the Intensive Care Unit. *J Intensive Care*  
765 *Med.* 2017; doi:10.1177/0885066615619895
- 766 75. Celandroni F, Salvetti S, Gueye SA, Mazzantini D, Lupetti A, Senesi S, et al.  
767 Identification and pathogenic potential of clinical *Bacillus* and *Paenibacillus*  
768 isolates. *PLoS One.* 2016; doi:10.1371/journal.pone.0152831
- 769 76. Adler A, Gottesman G, Dolfin T, Arnon S, Regev R, Bauer S, et al. *Bacillus* species  
770 sepsis in the neonatal intensive care unit. *J Infect.* 2005;  
771 doi:10.1038/ncpgasthep0256
- 772 77. Van Der Zwet WC, Parlevliet GA, Savelkoul PH, Stoof J, Kaiser AM, Van Furth  
773 AM, et al. Outbreak of *Bacillus cereus* infections in a neonatal intensive care unit  
774 traced to balloons used in manual ventilation. *J Clin Microbiol.* 2000;
- 775 78. Turabelidze G, Gee JE, Hoffmaster AR, Manian F, Butler C, Byrd D, et al.  
776 Contaminated ventilator air flow sensor linked to *bacillus cereus* colonization of  
777 Newborns. *Emerg Infect Dis.* 2013; doi:10.3201/eid1905.120239
- 778 79. Cogen AL, Nizet V, Gallo RL. Skin microbiota: A source of disease or defence?  
779 *Br J Dermatol.* 2008; doi:10.1111/j.1365-2133.2008.08437.x
- 780 80. Lindsay JA. *Staphylococci*. *Molecular Typing in Bacterial Infections.* 2013.  
781 doi:10.1007/978-1-62703-185-1\_23
- 782 81. Chessa D, Ganau G, Mazzarello V. An overview of *staphylococcus epidermidis*  
783 and *staphylococcus aureus* with a focus on developing countries. *J Infect Dev*

- 784 Ctries. 2015; doi:10.3855/jidc.6923  
785 82. Becker K, Heilmann C, Peters G. Coagulase-negative staphylococci. Clin  
786 Microbiol Rev. 2014; doi:10.1128/CMR.00109-13  
787 83. Fischetti VA, Ryan P. Streptococcus. Practical Handbook of Microbiology, Third  
788 Edition. 2015. doi:10.1201/b17871  
789 84. Esfahani B, Basiri R, Mirhosseini S, Moghim S, Dolatkah S. Nosocomial  
790 Infections in Intensive Care Unit: Pattern of Antibiotic-resistance in Iranian  
791 Community. Adv Biomed Res. 2017; doi:10.4103/2277-9175.205527  
792 85. Patterson MJ. Streptococcus. In: Baron's Med Microbiol, editor. Medical  
793 Microbiology. University of Texas Medical Branch; 1996.  
794 86. Li S, Huang J, Chen Z, Guo D, Yao Z, Ye X. Antibiotic prevention for maternal  
795 group B streptococcal colonization on neonatal GBS-related adverse outcomes: A  
796 meta-analysis. Frontiers in Microbiology. 2017. doi:10.3389/fmicb.2017.00374  
797 87. Spanu T, De Angelis G, Cipriani M, Pedruzzi B, D'Inzeo T, Cataldo MA, et al. In  
798 Vivo Emergence of Tigecycline Resistance in Multidrug-Resistant Klebsiella  
799 pneumoniae and Escherichia coli . Antimicrob Agents Chemother. 2012;  
800 doi:10.1128/aac.00234-12  
801 88. Yue DM, Song C, Zhang B, Liu Z, Chai J, Luo Y, et al. Hospital-wide comparison  
802 of health care-associated infection among 8 intensive care units: A retrospective  
803 analysis for 2010-2015. Am J Infect Control. 2017; doi:10.1016/j.ajic.2016.10.011

804  
805  
806  
807  
808  
809  
810  
811  
812  
813  
814  
815  
816  
817  
818  
819  
820  
821  
822  
823  
824  
825  
826  
827  
828  
829  
830  
831  
832  
833

834 **Table 1. Essential characteristics and localization of the sequenced samples.**  
835

| Sample ID             | Sample source  | Care unit | Ward | Cleaning |
|-----------------------|----------------|-----------|------|----------|
| Pumps-ICUa            | Pump           | ICU       | A    | –        |
| Mattresses-ICUa       | Mattress       | ICU       | A    | –        |
| Rails-ICUa            | Rail           | ICU       | A    | –        |
| Monitors-ICUa         | Monitor        | ICU       | A    | –        |
| Ventilators-ICUa      | Ventilator     | ICU       | A    | –        |
| Pumps-ICUb            | Pump           | ICU       | B    | –        |
| Mattresses-ICUb       | Mattress       | ICU       | B    | –        |
| Rails-ICUb            | Rail           | ICU       | B    | –        |
| Monitors-ICUb         | Monitor        | ICU       | B    | –        |
| Ventilators-ICUb      | Ventilator     | ICU       | B    | –        |
| MedicalRecords-ICUab  | Medical record | ICU       | AB   | –        |
| Cards-ICUab           | Card           | ICU       | AB   | –        |
| Mobiles-ICUab         | Mobiles        | ICU       | AB   | –        |
| Handles-ICUab         | Handle         | ICU       | AB   | –        |
| DrugStations-ICUab    | Drug station   | ICU       | AB   | –        |
| Computers-ICUab       | Computer       | ICU       | AB   | –        |
| Pumps-ICUaA           | Pump           | ICU       | A    | +        |
| Mattresses-ICUaA      | Mattress       | ICU       | A    | +        |
| Rails-ICUaA           | Rail           | ICU       | A    | +        |
| Monitors-ICUaA        | Monitor        | ICU       | A    | +        |
| Ventilators-ICUaA     | Ventilator     | ICU       | A    | +        |
| Pumps-ICUbA           | Pump           | ICU       | B    | +        |
| Mattresses-ICUbA      | Mattress       | ICU       | B    | +        |
| Rails-ICUbA           | Rail           | ICU       | B    | +        |
| Monitors-ICUbA        | Monitor        | ICU       | B    | +        |
| Ventilators-ICUbA     | Ventilator     | ICU       | B    | +        |
| Cufflators-ICUabA     | Cufflator      | ICU       | AB   | +        |
| Pumps-NICUa           | Pump           | NICU      | A    | –        |
| Mattresses-NICUa      | Mattress       | NICU      | A    | –        |
| Rails-NICUa           | Rail           | NICU      | A    | –        |
| Monitors-NICUa        | Monitor        | NICU      | A    | –        |
| Ventilators-NICUa     | Ventilator     | NICU      | A    | –        |
| Pumps-NICUb           | Pump           | NICU      | B    | –        |
| Mattresses-NICUb      | Mattress       | NICU      | B    | –        |
| Rails-NICUb           | Rail           | NICU      | B    | –        |
| Monitors-NICUb        | Monitor        | NICU      | B    | –        |
| Ventilators-NICUb     | Ventilator     | NICU      | B    | –        |
| Mobiles-NICUab        | Mobiles        | NICU      | AB   | –        |
| Cards-NICUab          | Card           | NICU      | AB   | –        |
| Handles-NICUab        | Handle         | NICU      | AB   | –        |
| MedicalRecords-NICUab | Medical record | NICU      | AB   | –        |
| DrugStations-NICUab   | Drug station   | NICU      | AB   | –        |
| Computers-NICUab      | Computer       | NICU      | AB   | –        |

836  
837  
838

839 **Figure 1**

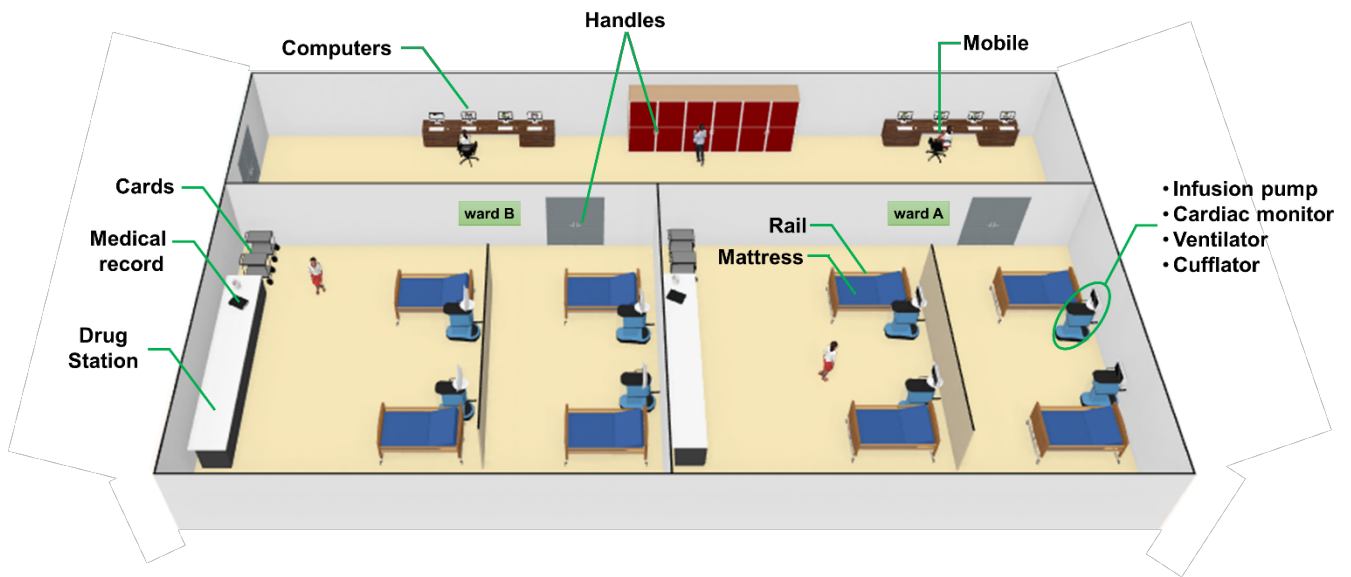

840

841 **Figure 1. 3D-rendered-model showing each sampling site of the (Neonatal) intensive care unit**  
842 **((N)ICU).** ICU and NICU are on different floors at the hospital but have a similar arrangement of wards and  
843 devices in general. A detailed explanation of each sample is shown in Table 1.

844

845

846

847

848

849

850

851

852

853

854

855

856

857



879 **Figure 3**

880  
881

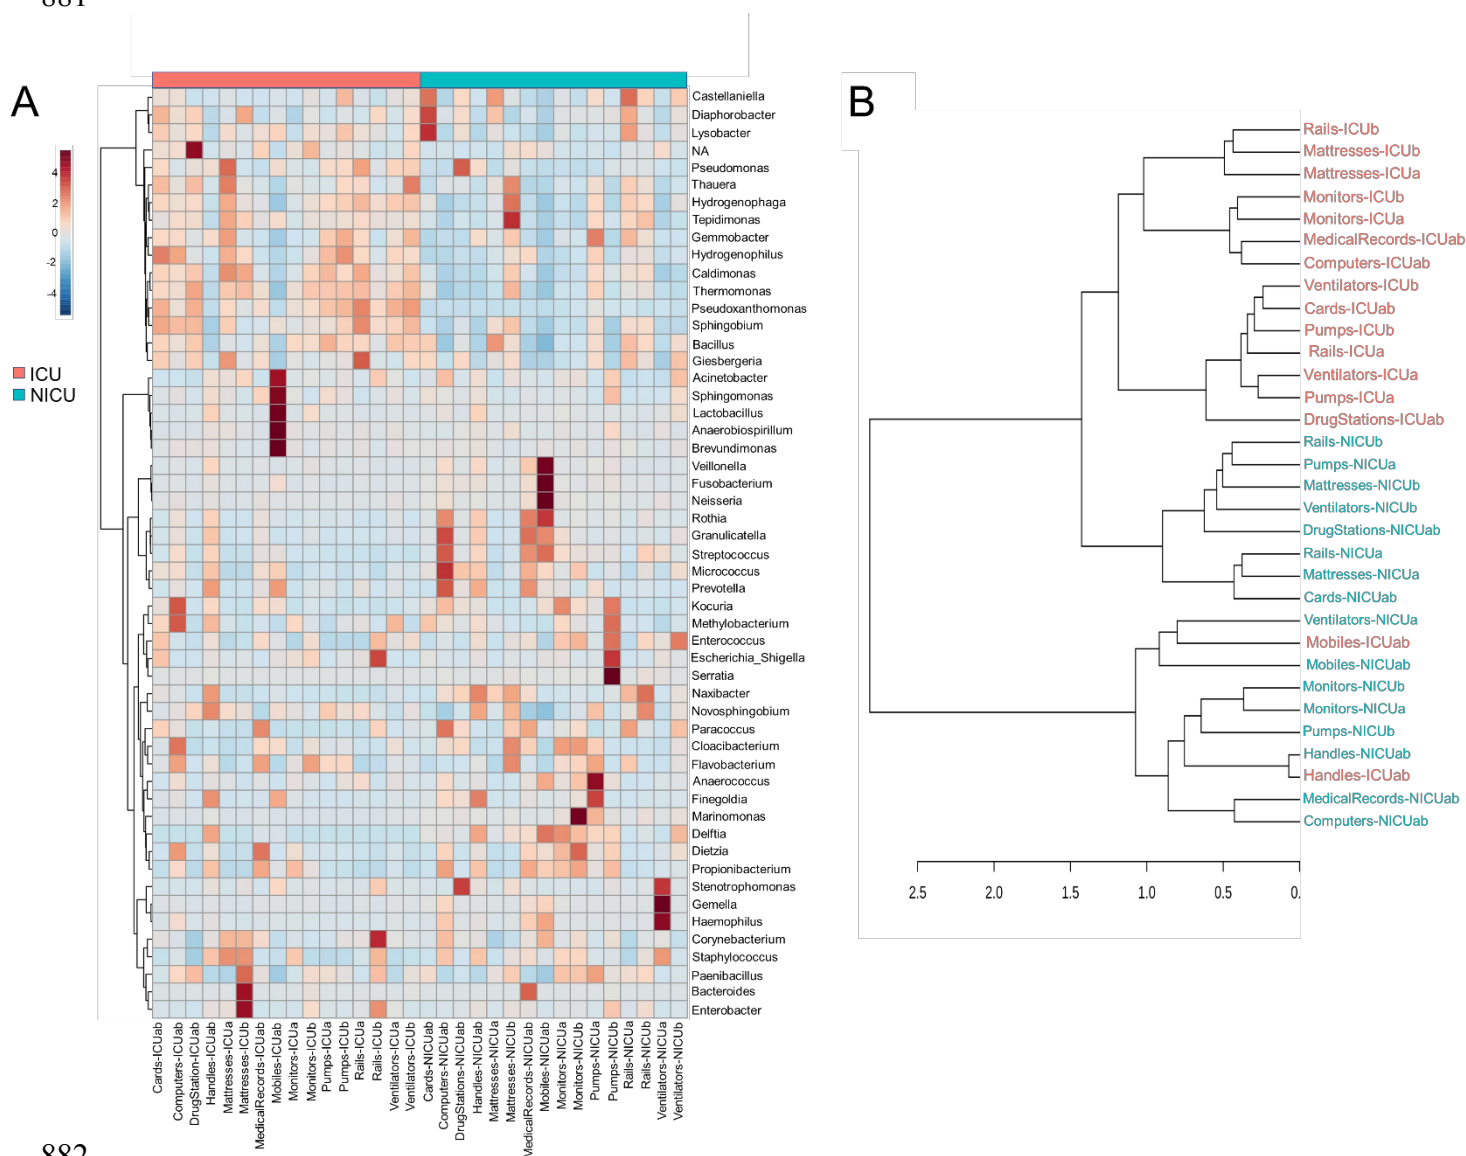

882  
883

884 **Figure 3. Clustering analysis of the ICU and NICU.** (A) Heatmap, and hierarchical clustering of  
885 the main genera associated with ICU and NICU samples. The heatmap shows the relative abundance  
886 of the top 52 bacterial genera (rows) in each sample (columns). Hierarchical clustering is based on  
887 Ward Clustering algorithm and Euclidean Distance measure to generate the hierarchical tree. The  
888 color bar indicates the range of the relative abundance. (B) Dendrogram showing the similarities  
889 between ICU and NICU samples. The dendrogram was created using the Jaccard index as distance  
890 measure and Ward's clustering algorithm.

891  
892  
893  
894  
895  
896



897 **Figure 4**

898

899

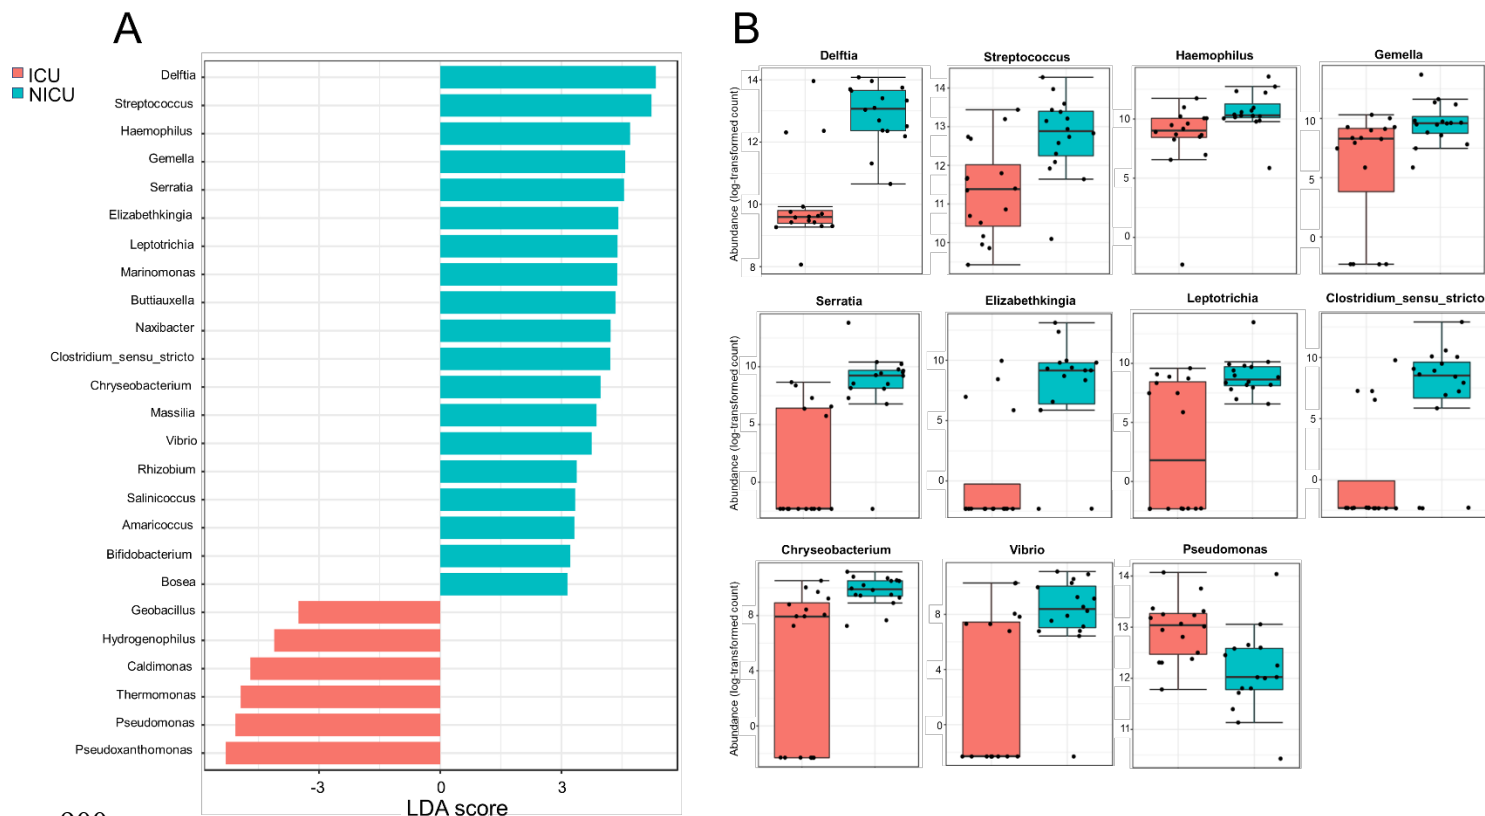

900

901

902 **Figure 4. Significant differences between ICU and NICU.** (A) Taxonomic biomarkers for ICU and  
 903 NICU. Linear Discriminant Analysis (LDA) combined with Effect Size (LEfSe) indicate significant  
 904 differences at the genus level that enable discrimination between the ICU and NICU samples ( $p <$   
 905  $0.05$ ). Only those genera with log LDA score  $>3$  are ultimately considered. (B) Boxplot of relative  
 906 abundance (log scale) of the eleven HAI-related bacterial genera with significant differences between  
 907 ICU (red,  $n=16$ ) and NICU (cyan,  $n=16$ ). The difference was calculated using Mann-  
 908 Whitney/Kruskal-Wallis test ( $p$ -value and FDR  $< 0.05$ ).

909

910

911

912

913

914

915

916

917



943 **Figure 6**

944

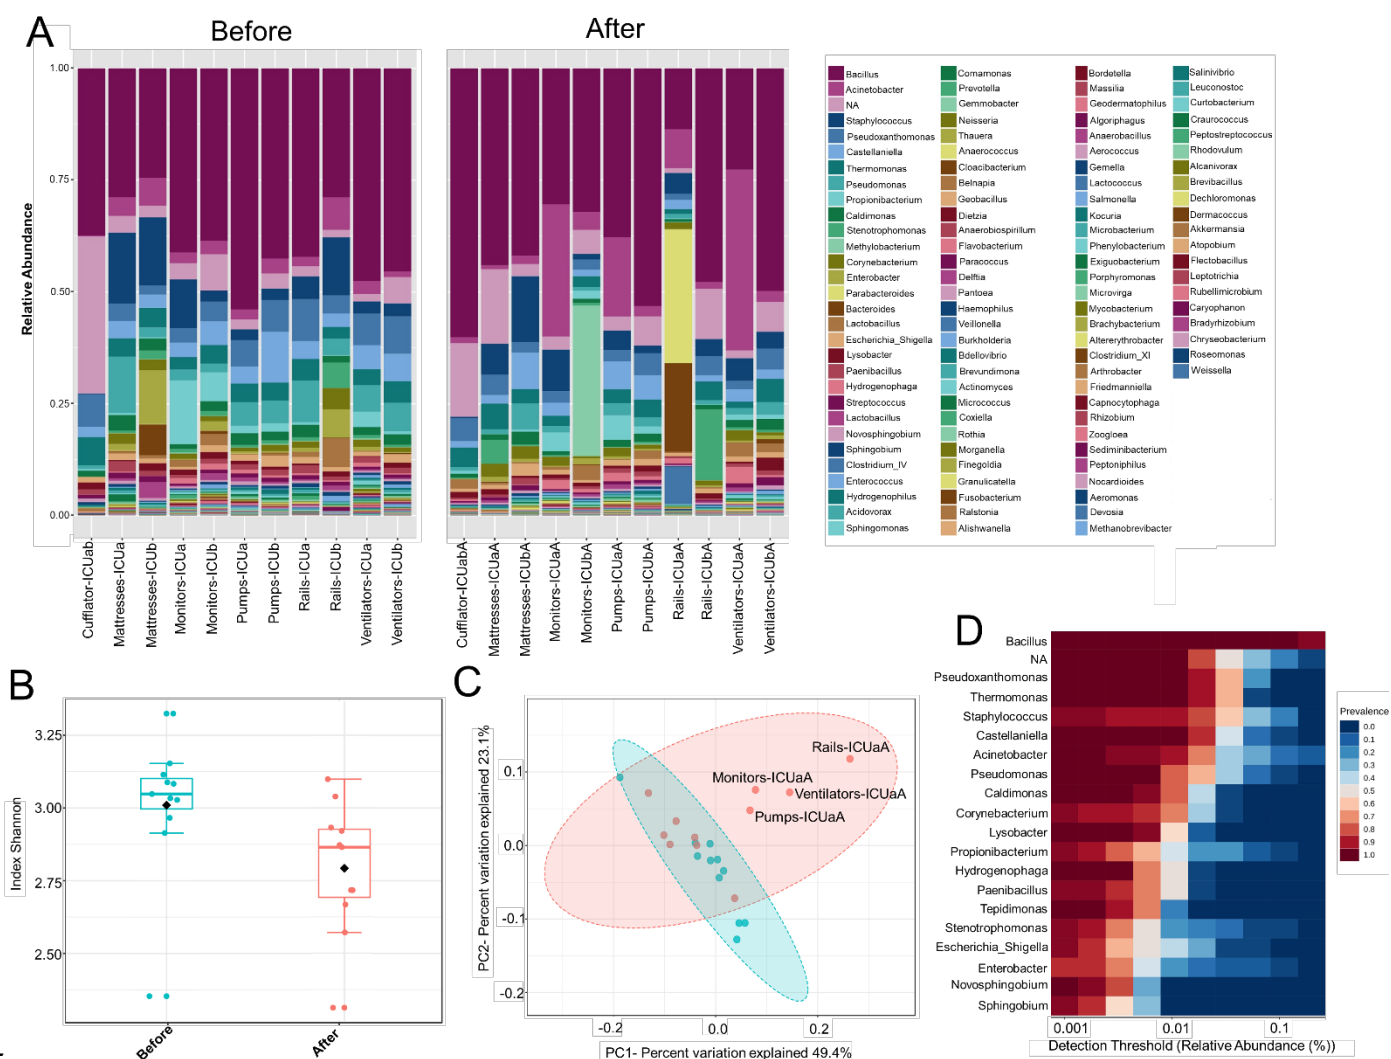

945

946

947

948 **Figure 6. ICU bacteria microbiota profile before and after cleaning.** (A) Relative bacterial  
 949 abundance at the genus level. Sequencing results are showed for each sample surface clustered using  
 950 Usearch algorithm with a 97% cutoff. Only genera with abundance > 1.0% were plotted. (B) Alpha  
 951 diversity at OTU level, before (red, n=11) and after cleaning (cyan, n=11) calculated using Shannon  
 952 index (Kruskal-Wallis test, p-value < 0.05). (C) PCoA plot based on Jensen-Shannon distances  
 953 between bacterial communities associated with cleaning (ANOSIM, R= 0.091961; p-value = 0.039).  
 954 Samples are shown as single dots. Divergence at OTU level was computed on Total sum scaling-  
 955 normalized (TSS-normalized) datasets. (D) Core microbiome analysis based on relative abundance  
 956 and sample prevalence of bacterial genus before and after cleaning.

957

958

959

960

961 **Figure 7**

962

963

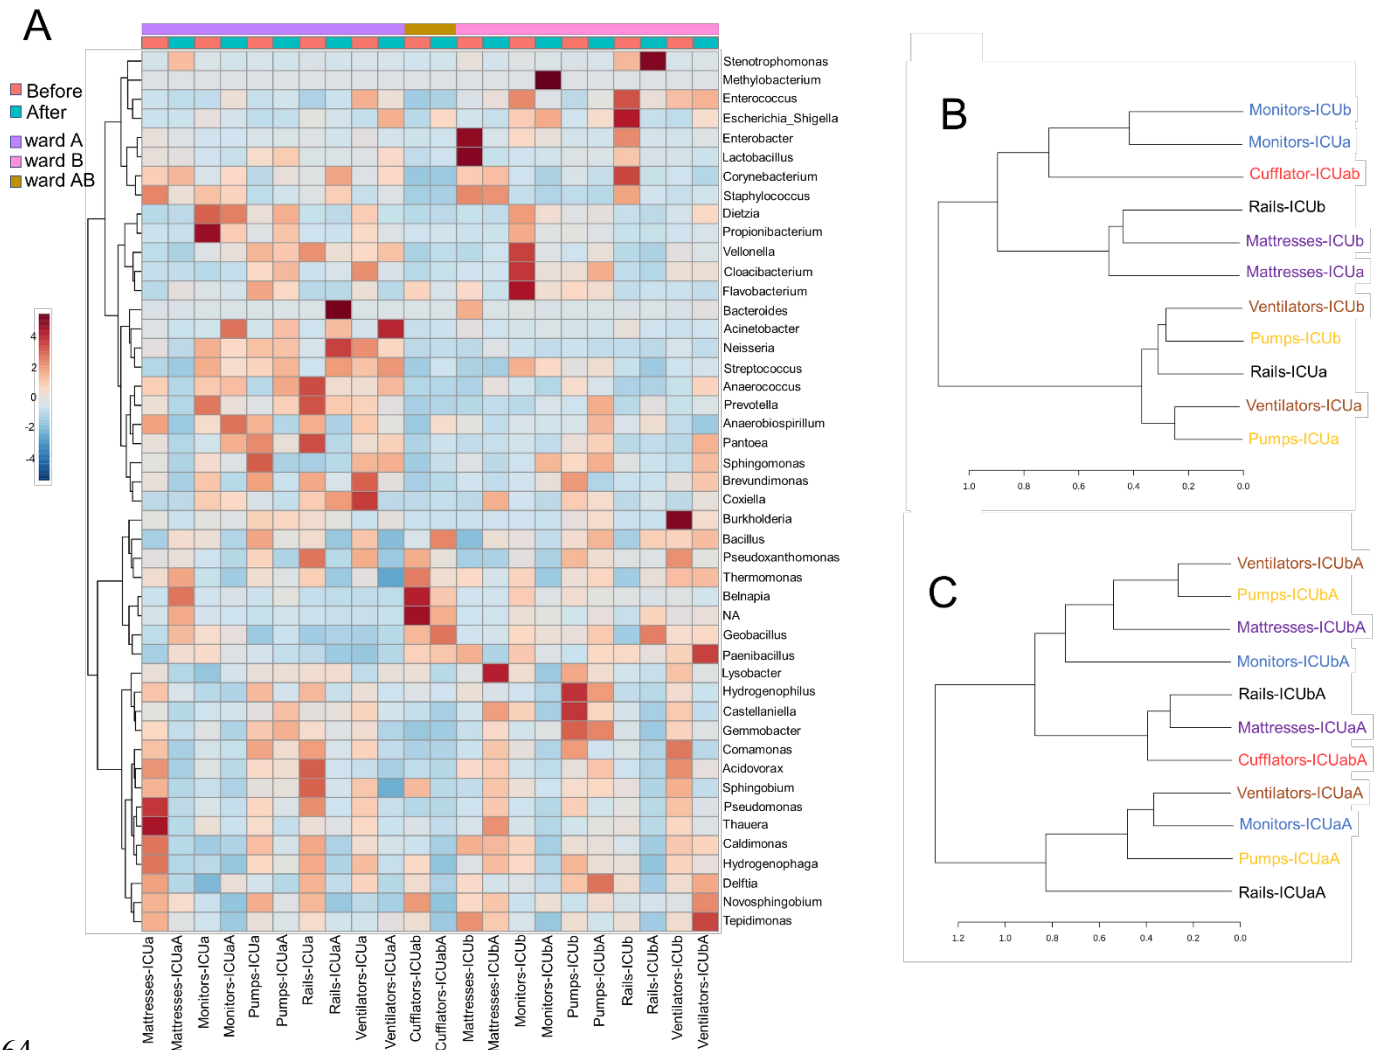

964

965

966 **Figure 7. Clustering analysis of the ICU samples before and after cleaning.** (A) Heatmap of the  
 967 main genera associated with ICU samples before and after cleaning. The heatmap shows the relative  
 968 abundance of top 45 bacterial genera (rows) in each sample (columns). The color bar indicates the  
 969 range of the relative abundance. Dendrogram showing the similarities between samples (B) before  
 970 and (C) after cleaning. The dendrogram was created using the Jaccard index as distance measure and  
 971 Ward's clustering algorithm.

972

973

974

975

976

977

978

979





1002 **Supplementary material**

1003 **Figure S1**

1004

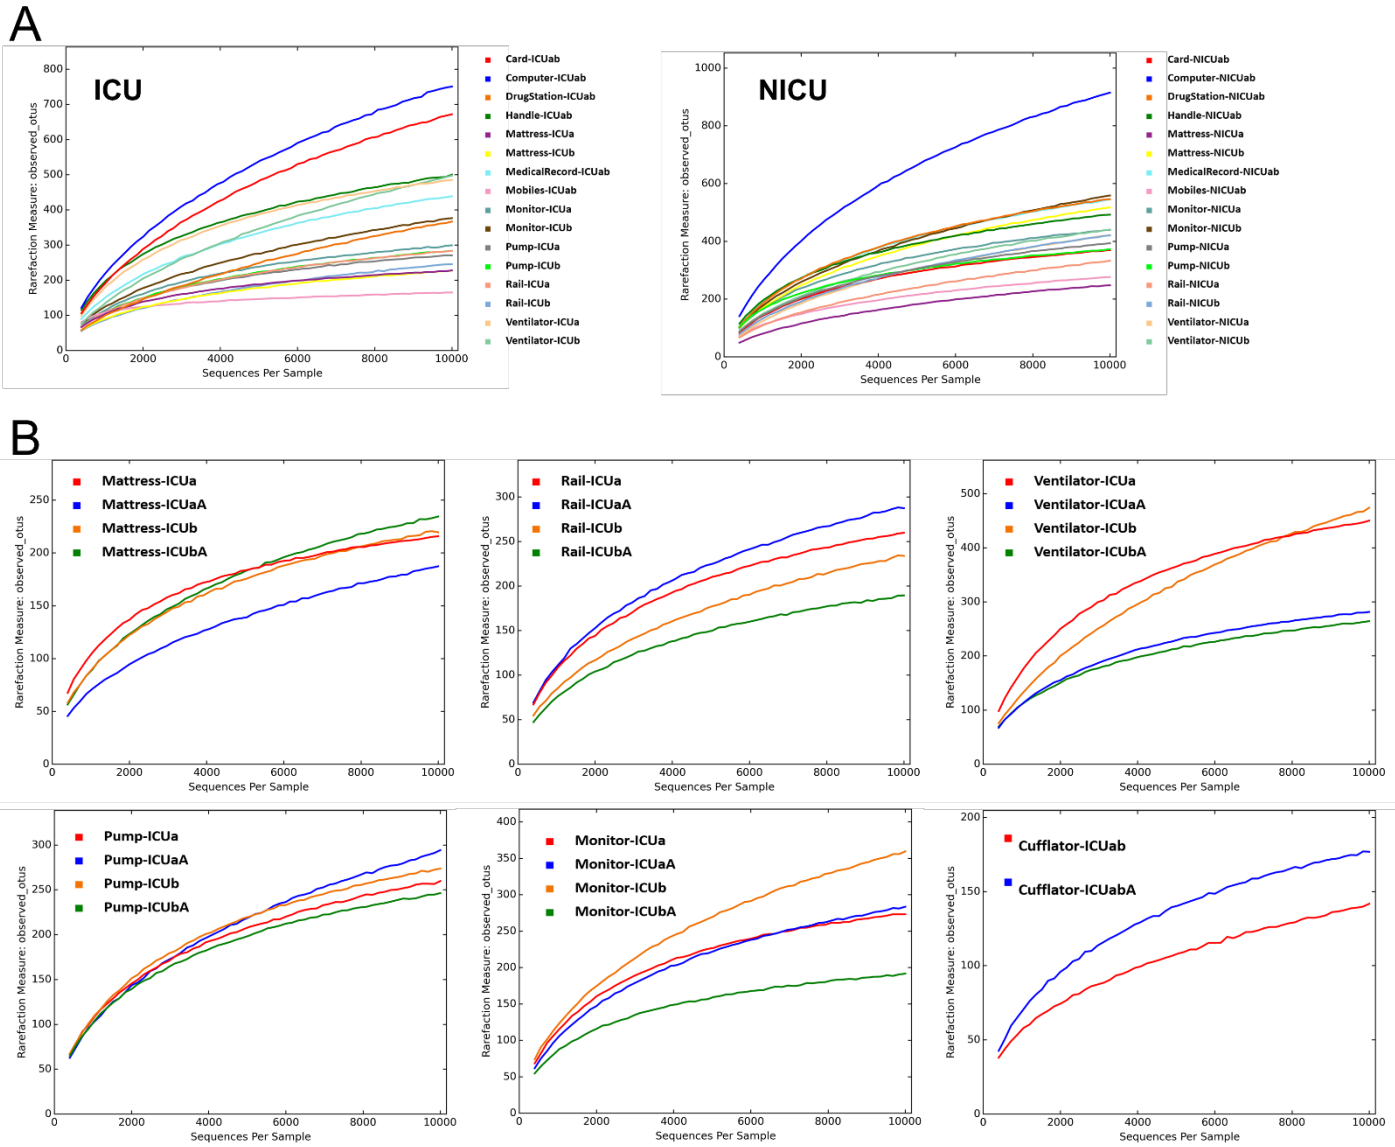

1005

1006 **Figure S1. Rarefaction curve showing the relationship between the sequencing per sample and the**  
1007 **number of OTUs that these reads represent. (A) ICU and NICU, and (B) ICU before and after cleaning.**  
1008 Sequences were rarefied with 33.708 read counts per sample.

1009

1010

1011

1012

1013

1014

1015

1016

1017



1018 **Figure S2**

1019

1020

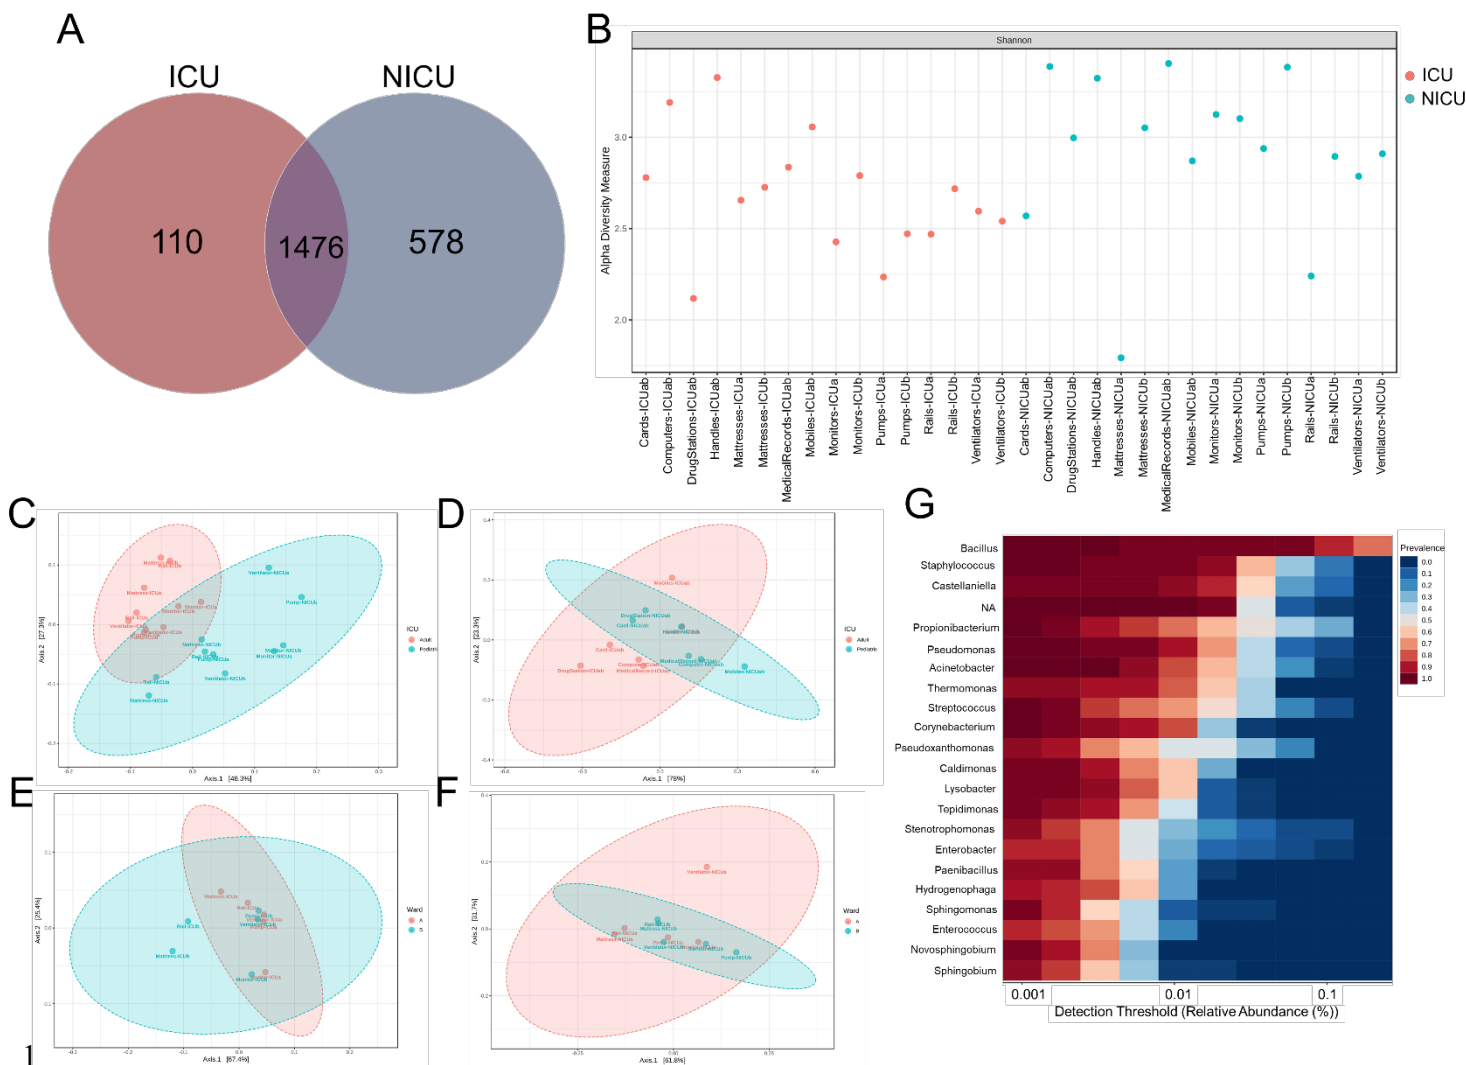

1022

1023 **Figure S2.** (A) Venn diagram showing shared and unique OTUs. (B) Alpha diversity at the OTU level  
 1024 for each sample at ICU (red) and NICU (cyan) calculated using Shannon index (Kruskal-Wallis test,  
 1025 p-value < 0.05). PCoA plot based on Jensen-Shannon distances between bacterial communities  
 1026 associated with (C) ICU and NICU boxes areas (ANOSIM, R = 0.50756; p-value < 0.001); (D) ICU  
 1027 and NICU common areas (ANOSIM, R = 0.14074; p-value = 0.116); (E) ICU wards (ANOSIM, R=  
 1028 0.124; p-value = 0.177); (F) NICU wards (ANOSIM, R = -0.02; p-value = 0.52). Samples are shown  
 1029 as single dots. (G) Core microbiome analysis based on relative abundance and sample prevalence of  
 1030 bacterial genus in ICU and NICU. Divergence at OTU level was computed on Total sum scaling-  
 1031 normalized (TSS-normalized) datasets.

1032

1033

1034

1035

1036

1037

1038

1039 **Figure S3**

1040

1041

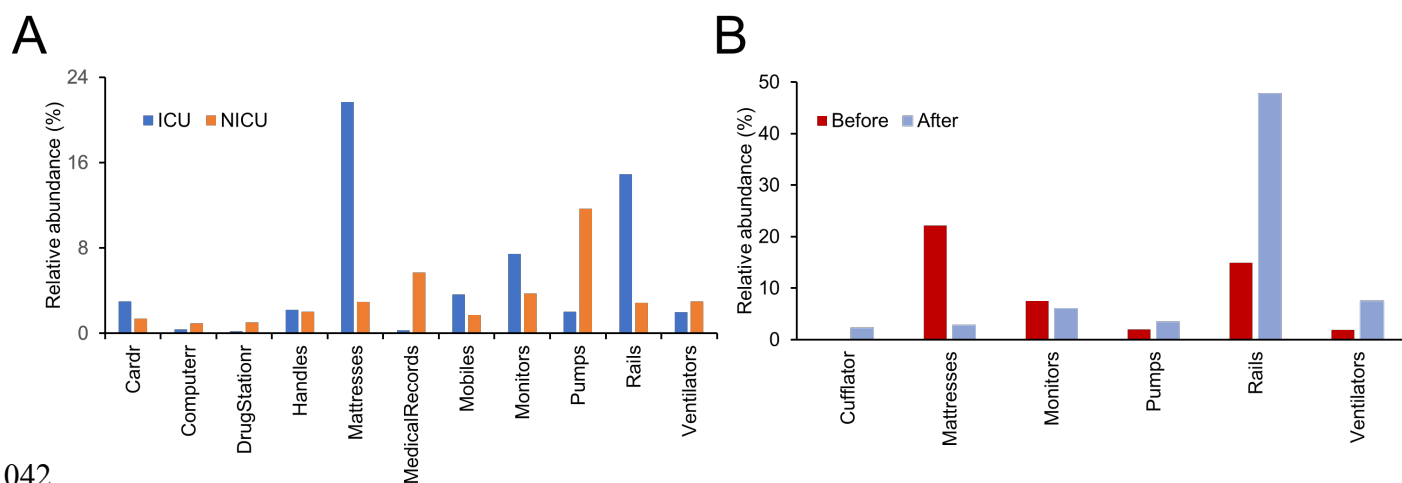

1042

1043

1044 **Figure S3.** The abundance of fecal indicators in **(A)** ICU/NICU and **(B)** ICU before/after cleaning.

1045

1046

1047

1048

1049

1050

1051

1052

1053

1054

1055

1056

1057

1058

1059

1060

1061

1062

1063

1064

1065

1066

1067

1068

1069

1070

1071 **Figure S4**

1072

1073

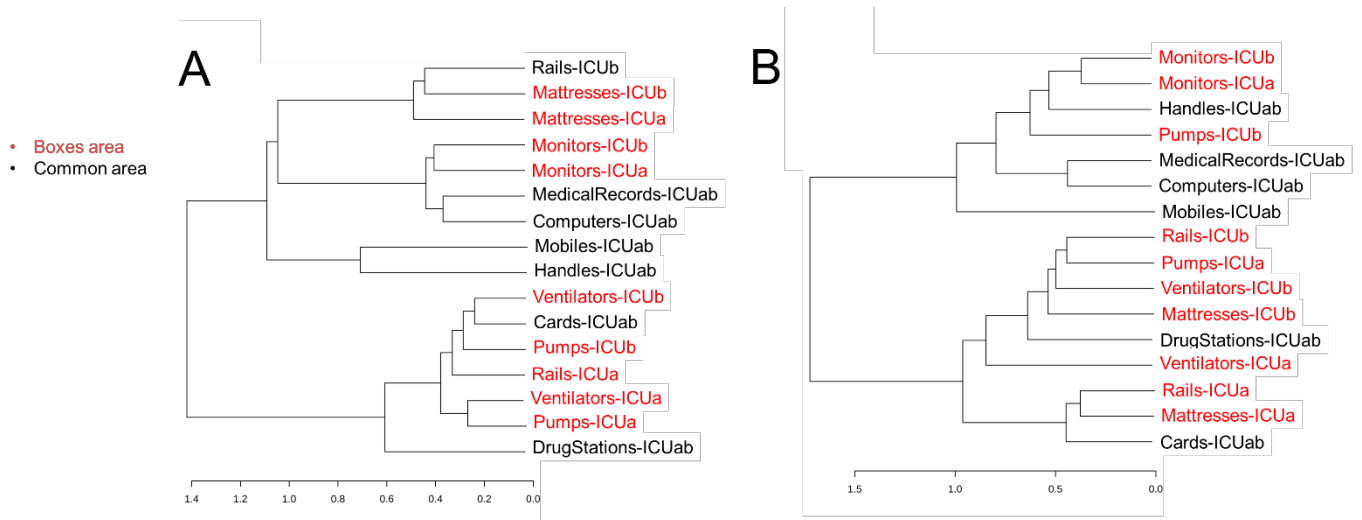

1074

1075

1076 **Figure S4. Dendrogram showing the similarities between samples. (A) ICU; (B) NICU. The**  
1077 **dendrogram was created using the Jaccard index as distance measure and Ward's clustering algorithm.**

1078

1079

1080

1081

1082

1083

1084

1085

1086

1087

1088

1089

1090

1091

1092

1093

1094

1095

1096

1097

1098

1099

1100

1101

1102

1103

1104

1105 **Figure S5**

1106

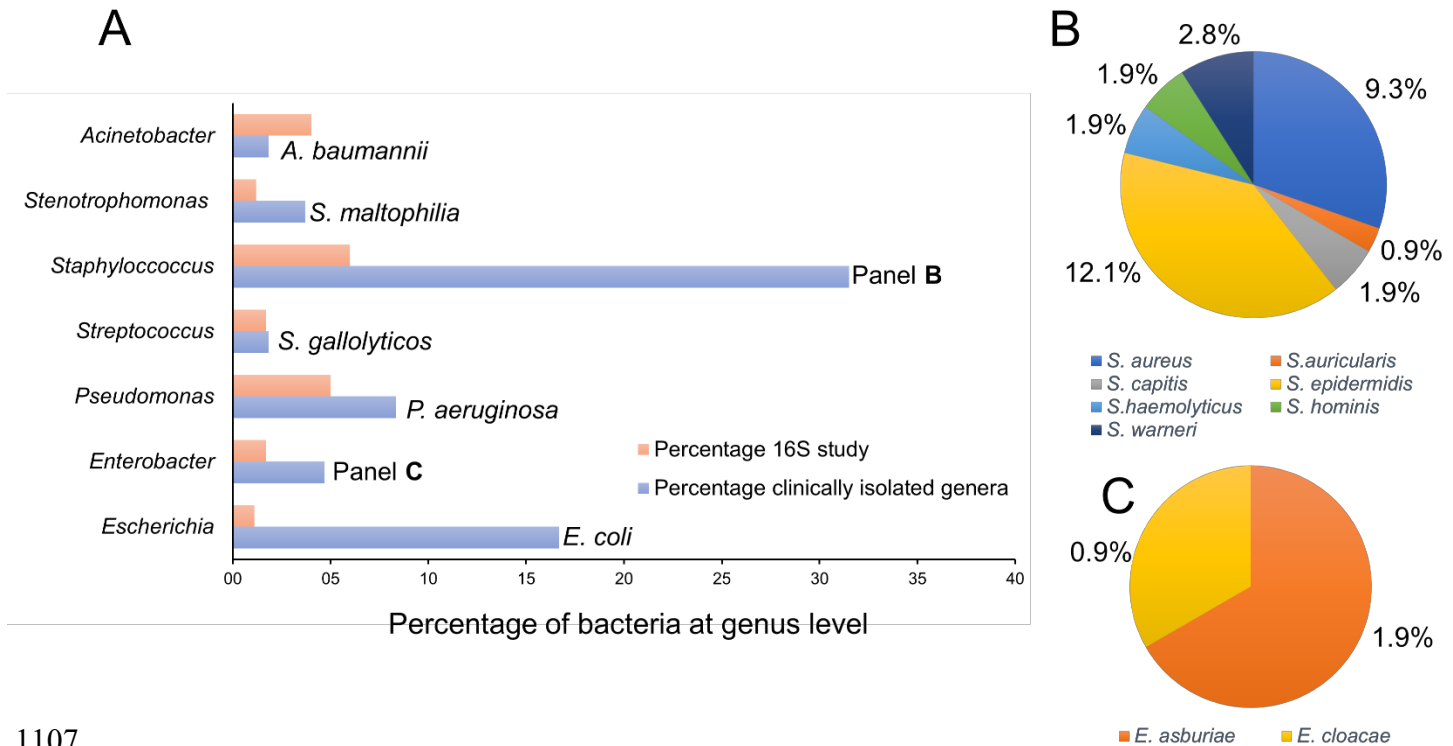

1107

1108

1109 **Figure S5. Percentage of identified bacteria at the genus level from the 16S analysis and isolated**  
 1110 **bacteria from clinical samples. (A)** A total of 108 bacterial strains (gathered in 12 different genera)  
 1111 isolated from blood, bronchoalveolar lavage, peritoneal, cerebrospinal and ascitic fluids of hospitalized  
 1112 patients in the ICU were evaluated. In the graph are represented only the seven most abundant genera  
 1113 from the 16S amplicon study (considering up to 4% of all quality sequences). Data at the level of  
 1114 species are presented just for the bacteria isolated from clinical samples. Percentage of species  
 1115 belonging to the genera *Staphylococcus* (**B**) and *Enterobacter* (**C**), concerning the 108 bacterial strains  
 1116 isolated. For the other genera, single species were identified among biological samples, as presented  
 1117 in panel A.

1118

1119

1120

1121

1122

1123

1124

1125

1126

1127

1128

1129

1130

1131

1132

1133 **Figure S6**

1134

1135

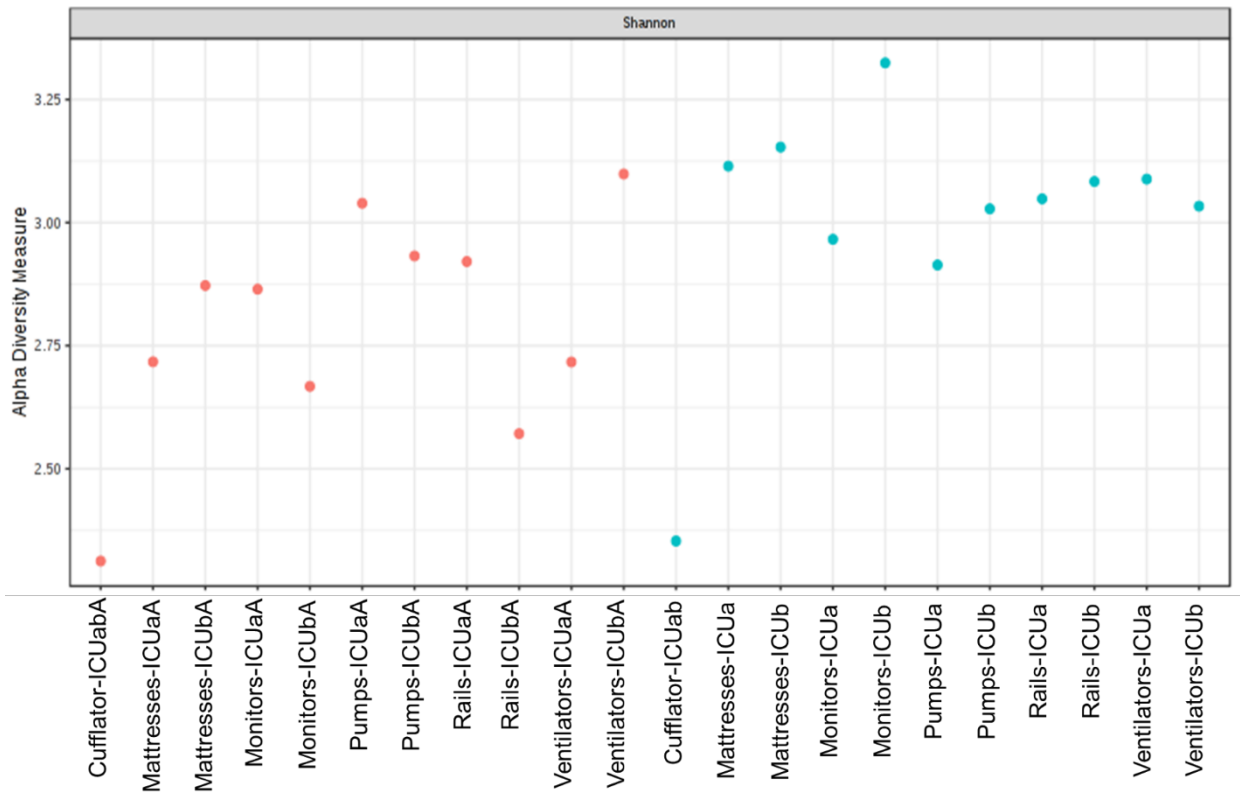

1136

1137

1138

1139 **Figure S6.** Alpha diversity at OTU level for each sample at ICU before (red) and after cleaning (cyan)  
1140 calculated using Shannon index (Kruskal-Wallis test, p-value < 0.05).

1141

1142

1143

1144

1145

1146

1147

1148

1149

1150

1151

1152

1153

1154

1155

1156

1157

1158

1159

1160 **Figure S7**

1161

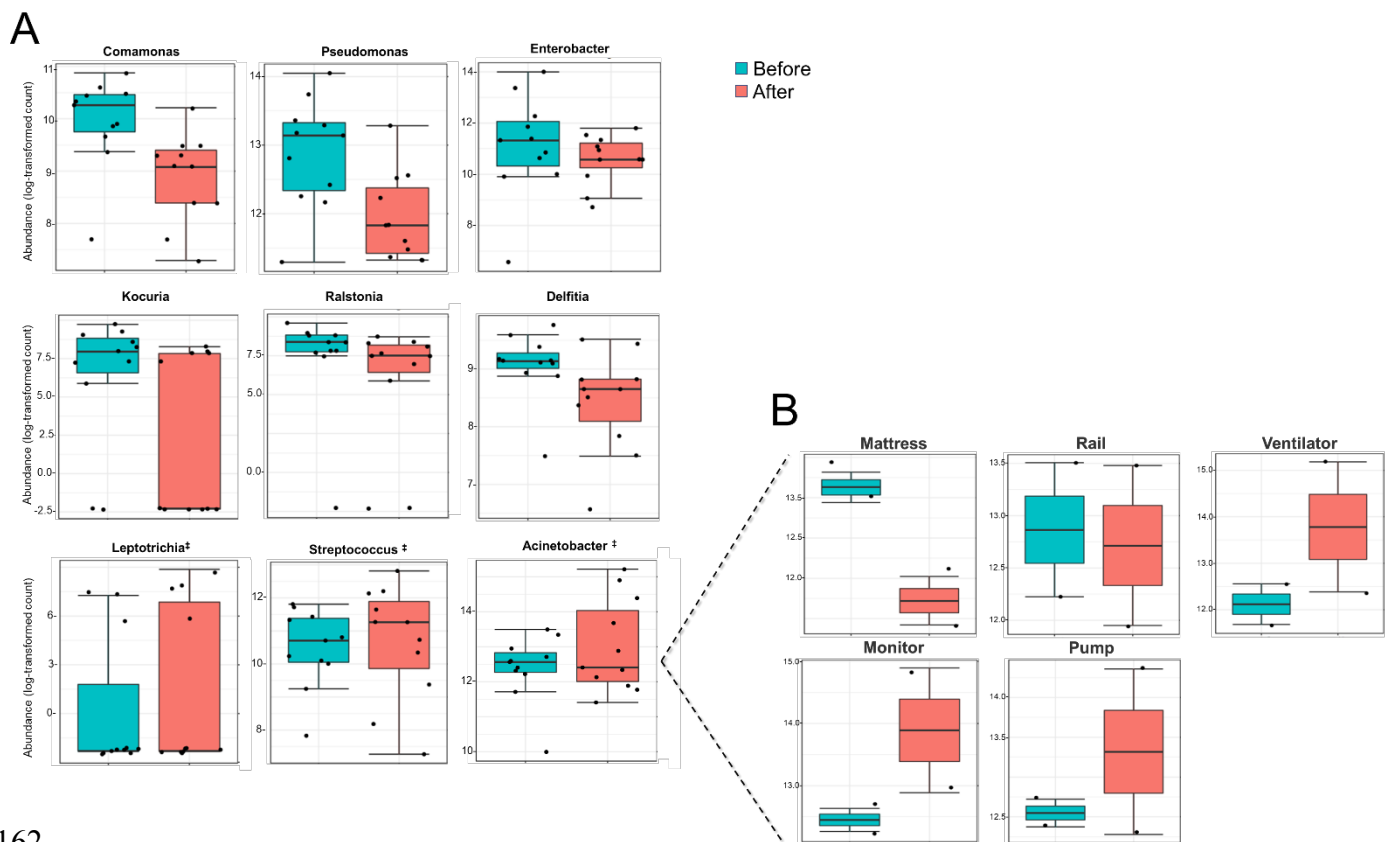

1162

1163

1164 **Figure S7.** (A) Boxplot of relative abundance (log scale) of the genera HAI-related before (cyan) and  
 1165 after (red) cleaning. The difference was calculated using Mann-Whitney/Kruskal-Wallis test (FDR  
 1166  $\geq 0.3$ ). ‡Genera with higher abundance after cleaning. (B) Differential relative abundance for  
 1167 *Acinetobacter* across all the ICU samples.

1168

1169

1170

1171

1172

1173

1174

1175

1176

1177

1178

1179

1180

1181

1182

1183

1184

1185



## 1186 **Supplementary text**

### 1187 *Oxygen tolerance*

1188 Most of the samples contained a mixture of organisms with various degrees of  
1189 oxygen tolerance. The number of strictly aerobic genera were highly represented (50%)  
1190 followed by facultative anaerobe (36%) and obligatory anaerobic bacteria (14%) for both  
1191 units. Infections caused by anaerobic bacteria are often underestimated, due to the  
1192 difficulty to isolate and identify these microorganisms. The use of unspecific therapy  
1193 against these infections may cause clinical failures [61]. Most abundant anaerobic  
1194 organisms in ICU were, on decrescent order, *Propionibacterium*, *Bacteroides*, and  
1195 *Prevotella*, whereas for NICU were *Propionibacterium*, *Prevotella*, and *Veillonella*.  
1196 *Propionibacterium* is a human skin-associated genus [62], while *Prevotella* and  
1197 *Veillonella* are part of the healthy microflora in the oral cavity and vaginal [51,63].  
1198 However, many species of *Prevotella*, and *Veillonella* genera are pathogens that cause  
1199 oral or respiratory diseases [64], as well as meningitis [64]. *Veillonella* has also been  
1200 involved in prosthetic cardiac valve or joint infections [65,66] and fatal sepsis [67].  
1201 *Bacteroides* species are usually part of the gastrointestinal microbiota [68], and they make  
1202 a significant portion of the fecal bacterial population [69]. Among all anaerobic bacteria,  
1203 *Bacteroides*, *Prevotella*, and *Veillonella* are the most frequently isolated in clinical  
1204 samples of infection [70].

1205

### 1206 *Gram-positive bacteria*

1207 Gram-positive bacteria were found in higher abundance in both units (Gram-  
1208 positive and Gram-negative at ICU — 49% and 46%; NICU — 52% and 44.5%,  
1209 respectively; ~5% were Gram-variable). Nonetheless, in terms of the number of genera,  
1210 Gram-negative bacteria were predominant in both ICU (70%) and NICU (66%). Over the  
1211 last decades, the focus of infection control centers was targeting Gram-positive pathogens  
1212 due to their high rate of morbidity and mortality [71]. However, the incidence of  
1213 infections in UTIs caused by Gram-negative bacteria has been rising alarmingly,  
1214 requiring a better understanding of hospital microbiomes [72–74].

1215 The five more abundant Gram-positive genera found in both ICU and NICU  
1216 samples were, in order of decreasing abundance, *Bacillus*, *Staphylococcus*,  
1217 *Propionibacterium*, *Streptococcus*, and *Corynebacterium*. Core microbiome analysis was  
1218 performed combining samples from both ICU and NICU. In total, 21 genera were shared

1219 in 80% of all samples at the minimum detection threshold of 0.001% relative abundance  
1220 (**Fig. S2G**). The most abundant Gram-positive genera were also among the top 10 more  
1221 prevalent. Most notably, *Bacillus* was the most prevalent genus in the core microbiome  
1222 for both care units. *Bacillus* was also most abundant in ICU (36%) and NICU (26%)  
1223 (**Fig. 2A**), mainly in the boxes area. To examine more deeply the bacterial community  
1224 variations among the samples, a heatmap of the top 52 genera is illustrated in **Fig. 3A**.  
1225 Accordingly, the ICU pumps and NICU mattresses contained the highest abundance of  
1226 the total reads (~6%) (**Fig. 3A**). The identification of the *Bacillus* genus in hospital  
1227 samples is often considered clinically safe since it is ubiquitous in the environment.  
1228 However, recently outbreaks of severe and lethal *Bacillus* infections have been widely  
1229 reported, especially diseases related with *Bacillus cereus* at NICUs [75,76]. Several of  
1230 these infections resulted of contamination of respiratory equipment [76–78]. Therefore,  
1231 contamination with this genus should not be routinely neglected.

1232 Several clinical and metagenomic studies have described Gram-positive bacteria  
1233 as a highly frequent colonizer of the skin [52,79]. The skin-associated genera  
1234 *Staphylococcus*, *Propionibacterium*, *Streptococcus*, and *Corynebacterium*, were found in  
1235 high abundance in surfaces frequently touched by hands of healthcare workers (HCW)  
1236 such as, in order of decreasing abundance, computers, door handles, medical records,  
1237 monitors, and mobiles (**Fig. 3A**). Most of the bacteria of these genera are harmless but  
1238 may become opportunistic pathogens for immunocompromised patients [39]. Moreover,  
1239 a high abundance of these genera was also observed in ventilators and pumps, suggesting  
1240 that skin contact may be an essential source of contamination. *Staphylococcus* was found  
1241 in all samples with a total abundance of 6% for both ICU and NICU. In the boxes area,  
1242 this genus was more present on mattresses in ICU and ventilators in NICU (**Fig. 3A**).  
1243 *Staphylococcus* can be found on the skin or in the nose of healthy patients causing no  
1244 disease or only minor skin infections. However, several species can be deadly when  
1245 invading bloodstream, joints, bones, lungs or heart [80]. *Staphylococcus aureus* is the  
1246 most pathogenic and well-established species in the hospital environment.

1247 Furthermore, coagulase-negative species such as *S. epidermidis*, *S. sciuri*, and *S.*  
1248 *haemolyticus* are also an emerging problem in UTIs [80–82]. *Streptococcus* was found in  
1249 all samples with a total abundance of 1.7% and 5% for ICU and NICU, respectively. In  
1250 the boxes area, this genus was more present on monitors for both ICU and NICU (**Fig.**  
1251 **3Aa**). Nosocomial infections with *Streptococcus spp.* are often associated with  
1252 respiratory or skin diseases [83] and cause long days of hospitalization [84]. Species such

1253 as *S. pneumoniae* is the first most common cause of fatal bacterial pneumonia in  
1254 developing countries with high morbidity in children [85]. Group B *Streptococcus*, a  
1255 commensal bacterium, is the leading cause of death from early-onset infections in the  
1256 neonate [86].

1257 Other Gram-positive genera related to nosocomial infection were found but in  
1258 intermediate abundance (0.5-1%), as, e.g., *Gemella*, *Enterococcus*, and *Clostridium*.  
1259 These genera were present mainly in NICU being more abundant in ventilators (**Fig.**  
1260 **3Aa**). However, they were also found in pumps (*Enterococcus*), door handles  
1261 (*Clostridium*) and computers (*Gemella*). A very low abundance ( $\leq 0.1\%$ ) of these genera  
1262 was observed in ICU samples, e.g., room cards).

1263

#### 1264 *Gram-negative bacteria*

1265 In the last decade, Gram-negative strains have gotten attention in their ability to  
1266 spread their antibiotic resistance in hospital environments [87]. New molecular protocols,  
1267 such as NGS, have allowed identifying emerging threats associated with nosocomial  
1268 infections and multidrug-resistant [16]. An analysis involving eight ICUs reported that  
1269 Gram-negative organisms were the principal responsible for HAI [88]. Here, the five  
1270 more abundant Gram-negative genera found in ICU samples were, in order of decreasing  
1271 abundance, *Pseudomonas*, *Pseudoxanthomonas*, *Castellaniella*, *Acinetobacter*,  
1272 *Thermomonas*. Whereas for NICU were *Castellaniella*, *Delftia*, *Acinetobacter*,  
1273 *Stenotrophomonas*, *Pseudomonas*. Previous studies have reported *Acinetobacter* and  
1274 *Pseudomonas* as typical Gram-negative genera on (N)ICU surfaces [39].

1275 *Pseudomonas*, *Acinetobacter*, *Delftia*, and *Stenotrophomonas* are known for their  
1276 facultative pathogenic nature and for being nosocomial bacteria. *Pseudomonas*  
1277 constituted 5%, and 2.6% of the bacterial community at ICU and NICU, respectively. The  
1278 ICU mattresses and NICU drug station contained the highest abundance (**Fig. 3A**).  
1279 *Acinetobacter* was found in all samples with a total abundance of 4% and 3% for ICU  
1280 and NICU, respectively. *Acinetobacter* was more frequent on ICU mobiles. In the boxes  
1281 area, this genus was more present on ICU mattresses and NICU monitors (**Fig. 3A**).  
1282 *Delftia* showed an abundance of 1% at ICU and 5.5% at NICU, being more frequent on  
1283 mobiles and NICU monitors (**Fig. 3A**). *Stenotrophomonas* showed an abundance of 1.2%  
1284 and 2.7% for ICU and NICU, respectively. This genus was more present on NICU drug  
1285 station and ventilators (**Fig. 3A**). *Enterobacter* and *Escherichia\_Shigella* were also found  
1286 in high abundance in both units, mainly in pumps (NICU), and ICU bed mattresses and

1287 rails (**Fig. 3Aa**). In general, fecal indicators (*Enterobacter*, *Escherichia*, *Bacteroides*,  
1288 *Anaerobiospirillum*, and *Parabacteroides*) were more frequent in bed mattresses and rails  
1289 for ICU, and pumps for NICU (**Fig. S3Aa**).

1290 Others Gram-negative HAI-related genera such as *Elizabethkingia* (bed rails),  
1291 *Neisseria* (mobiles), *Haemophilus* (ventilators), *Leptotrichia* (mobiles), and *Serratia*  
1292 (pumps) were primarily present only in NICU. *Prevotella* and *Sphingomonas* were found  
1293 in both units in intermediate abundance.  
1294
